# Supplementary material for: Association of Blast Exposure in Military Breaching with Intestinal Permeability Blood Biomarkers Associated with Leaky Gut
Source: Preprints.org preprint supplement (doi:10.20944/preprints202401.1791.v1), 2024-01-25
Supplement: Supplementary file 4 [file supplementary]

Archive with 13 entries (13 files):
- sup/Supplemental Tables Legends.docx
- sup/table_s2.xlsx
- sup/table_s1.xlsx
- sup/figures/magnitude vs. delta alpha.tiff
- sup/figures/magnitude vs. delta zonulin.tiff
- sup/figures/magnitude vs. delta claudin3.tiff
- sup/figures/symptom increase vs. ifabp diff.tiff
- sup/figures/magnitude vs. delta lbp.tiff
- sup/figures/magnitude vs. delta ifabp.tiff
- sup/figures/symptom increase vs. lbp diff.tiff
- sup/figures/symptom increase vs. alpha diff.tiff
- sup/figures/symptom increase vs. zonulin diff.tiff
- sup/figures/symptom increase vs. claudin3 diff.tiff
