# Supplementary material for: Association of Blast Exposure in Military Breaching with Intestinal Permeability Blood Biomarkers Associated with Leaky Gut
Source: Preprints.org preprint supplement (doi:10.20944/preprints202401.1791.v1), 2024-01-25
Supplement: Supplementary file 4 [file supplementary › sup/Supplemental Tables Legends.docx]

**Table S1.** Correlations between alpha-diversity and IP biomarker change from pre to post and followup with cumulative blast exposure measured in peak pressure (psi) * time (ms),with corresponding significance reported.

**Table S2**. Association of changes in self-reported symptoms vs. changes in alpha-diversity and IP biomarkers, shown as effect sizes measured by Cohen’s d. For each elevated symptom self-reported, participants were assigned to either of two groups i.e., increasing vs. non-increasing by comparing the symptom scales reported at pre vs. post and pre vs. follow-up per subject. Then the increasing vs. the non-increasing groups by symptom were compared for differences in alpha-diversity and levels of IP biomarkers (separately) across timepoints (specifically post - pre and follow-up - pre). Mean and standard deviation of alpha-diversity and biomarkers for each group are reported along with the effect size.
