# Supplementary material for: Association of Blast Exposure in Military Breaching with Intestinal Permeability Blood Biomarkers Associated with Leaky Gut
Source: Preprints.org preprint supplement (doi:10.20944/preprints202401.1791.v1), 2024-01-25
Supplement: Supplementary file 4 [file supplementary › sup/table_s1.xlsx]

## Sheet: Sheet1
	Pre-post		Pre-followup
	Spearman r	p	Spearman r	p
Alpha diversity	-0.0684	0.7813	-0.3175	0.185
Zonulin	0.2966	0.247	0.0686	0.7947
LBP	0.4923	0.0398	0.7564	0.0004
Claudin3	0.2962	0.232	-0.226	0.3656
I-FABP	0.1702	0.4979	0.1765	0.4821
