# Supplementary figures and images for: Association of Blast Exposure in Military Breaching with Intestinal Permeability Blood Biomarkers Associated with Leaky Gut
Source: Preprints.org preprint supplement (doi:10.20944/preprints202401.1791.v1), 2024-01-25

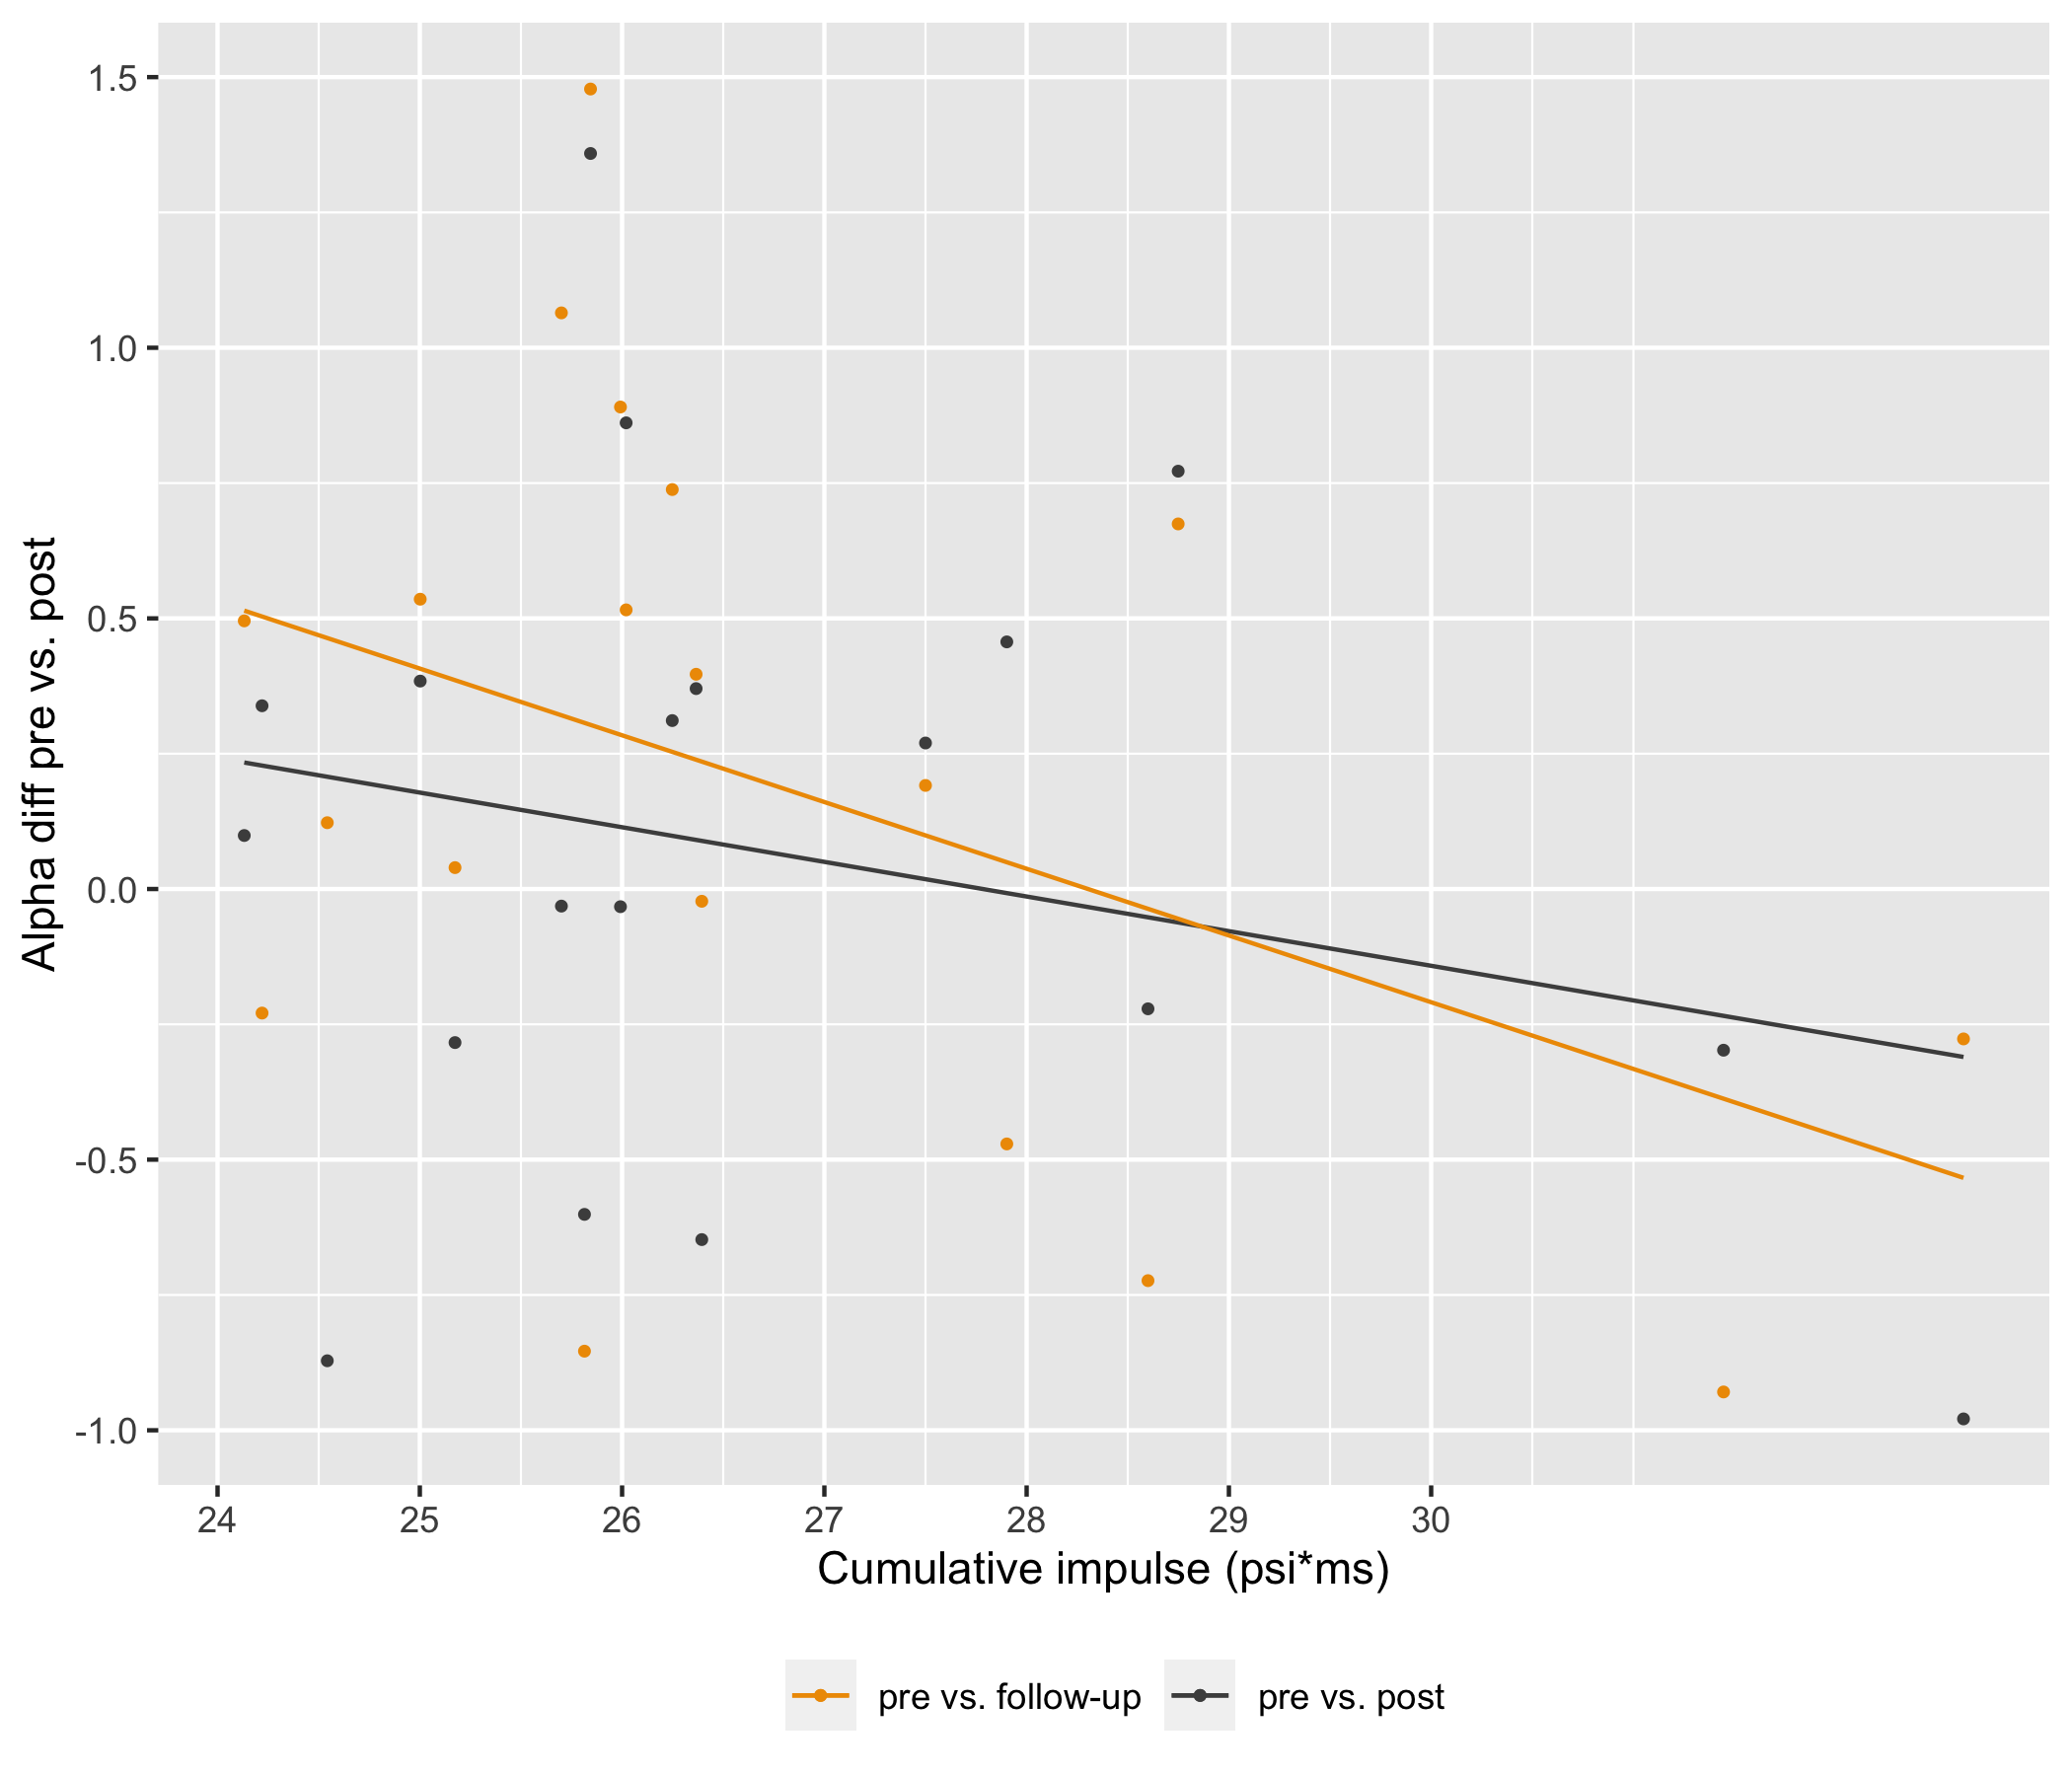

Supplement: Supplementary file 4 [file supplementary › sup/figures/magnitude vs. delta alpha.tiff]

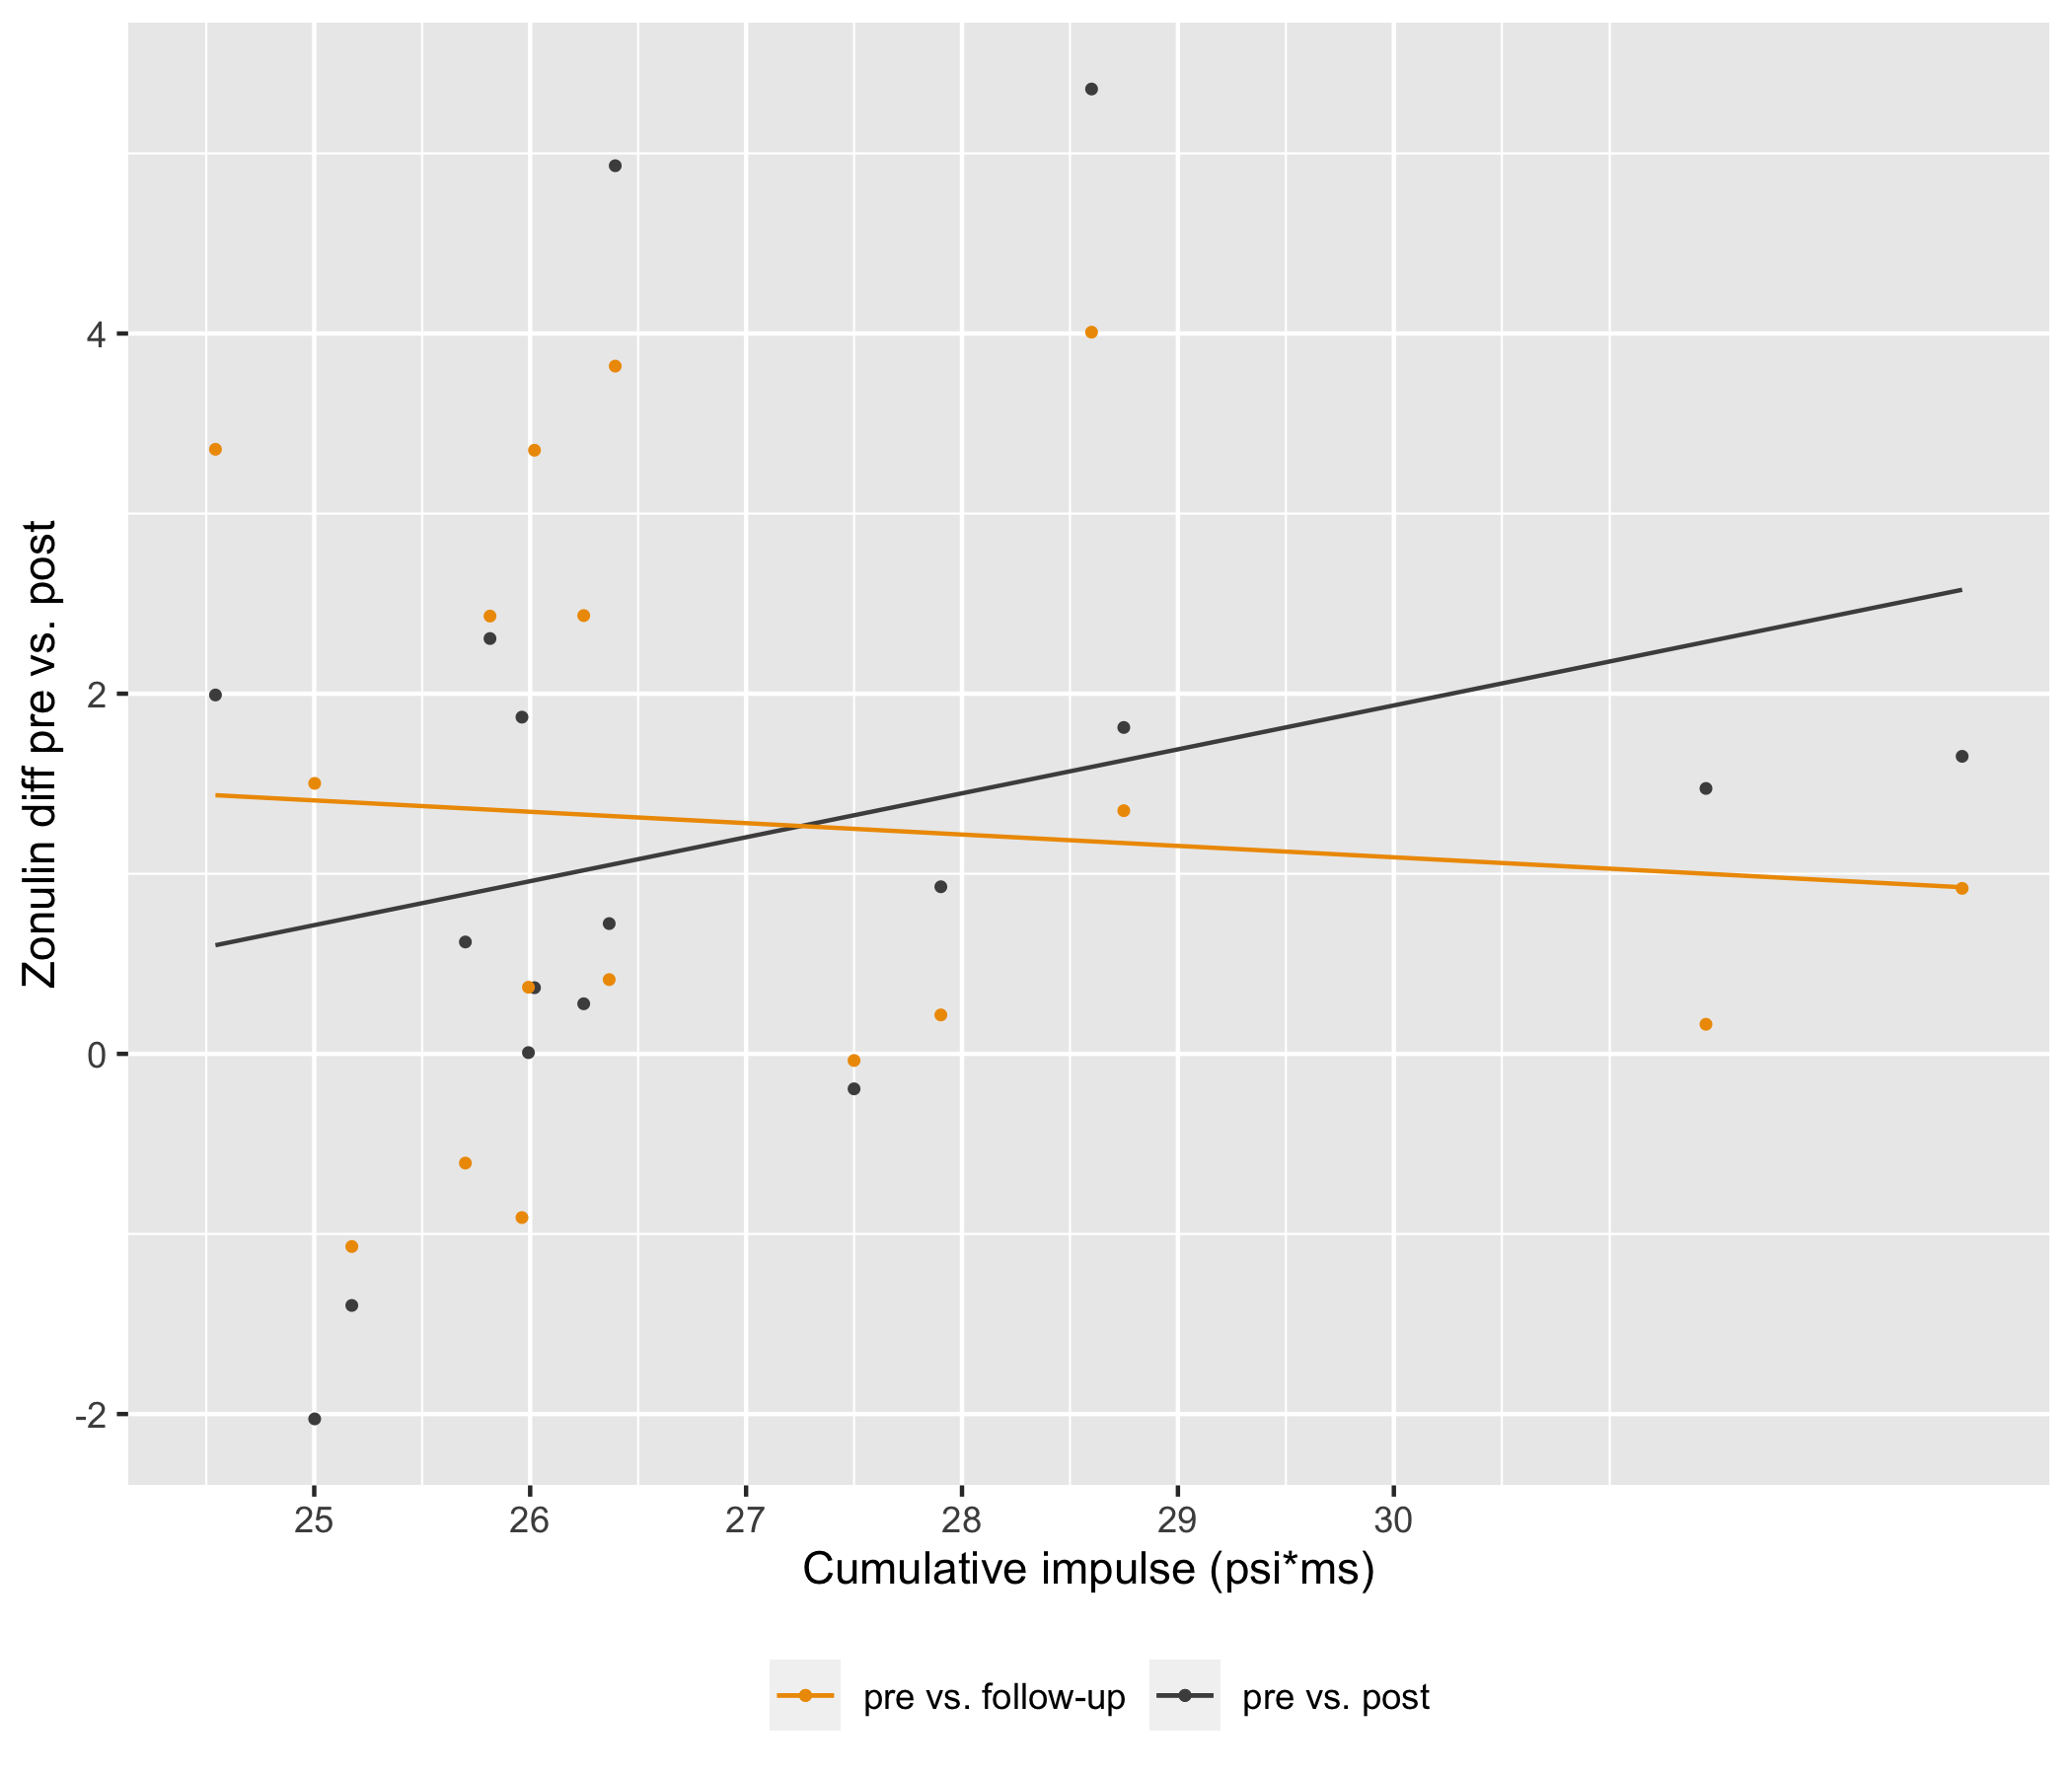

Supplement: Supplementary file 4 [file supplementary › sup/figures/magnitude vs. delta zonulin.tiff]

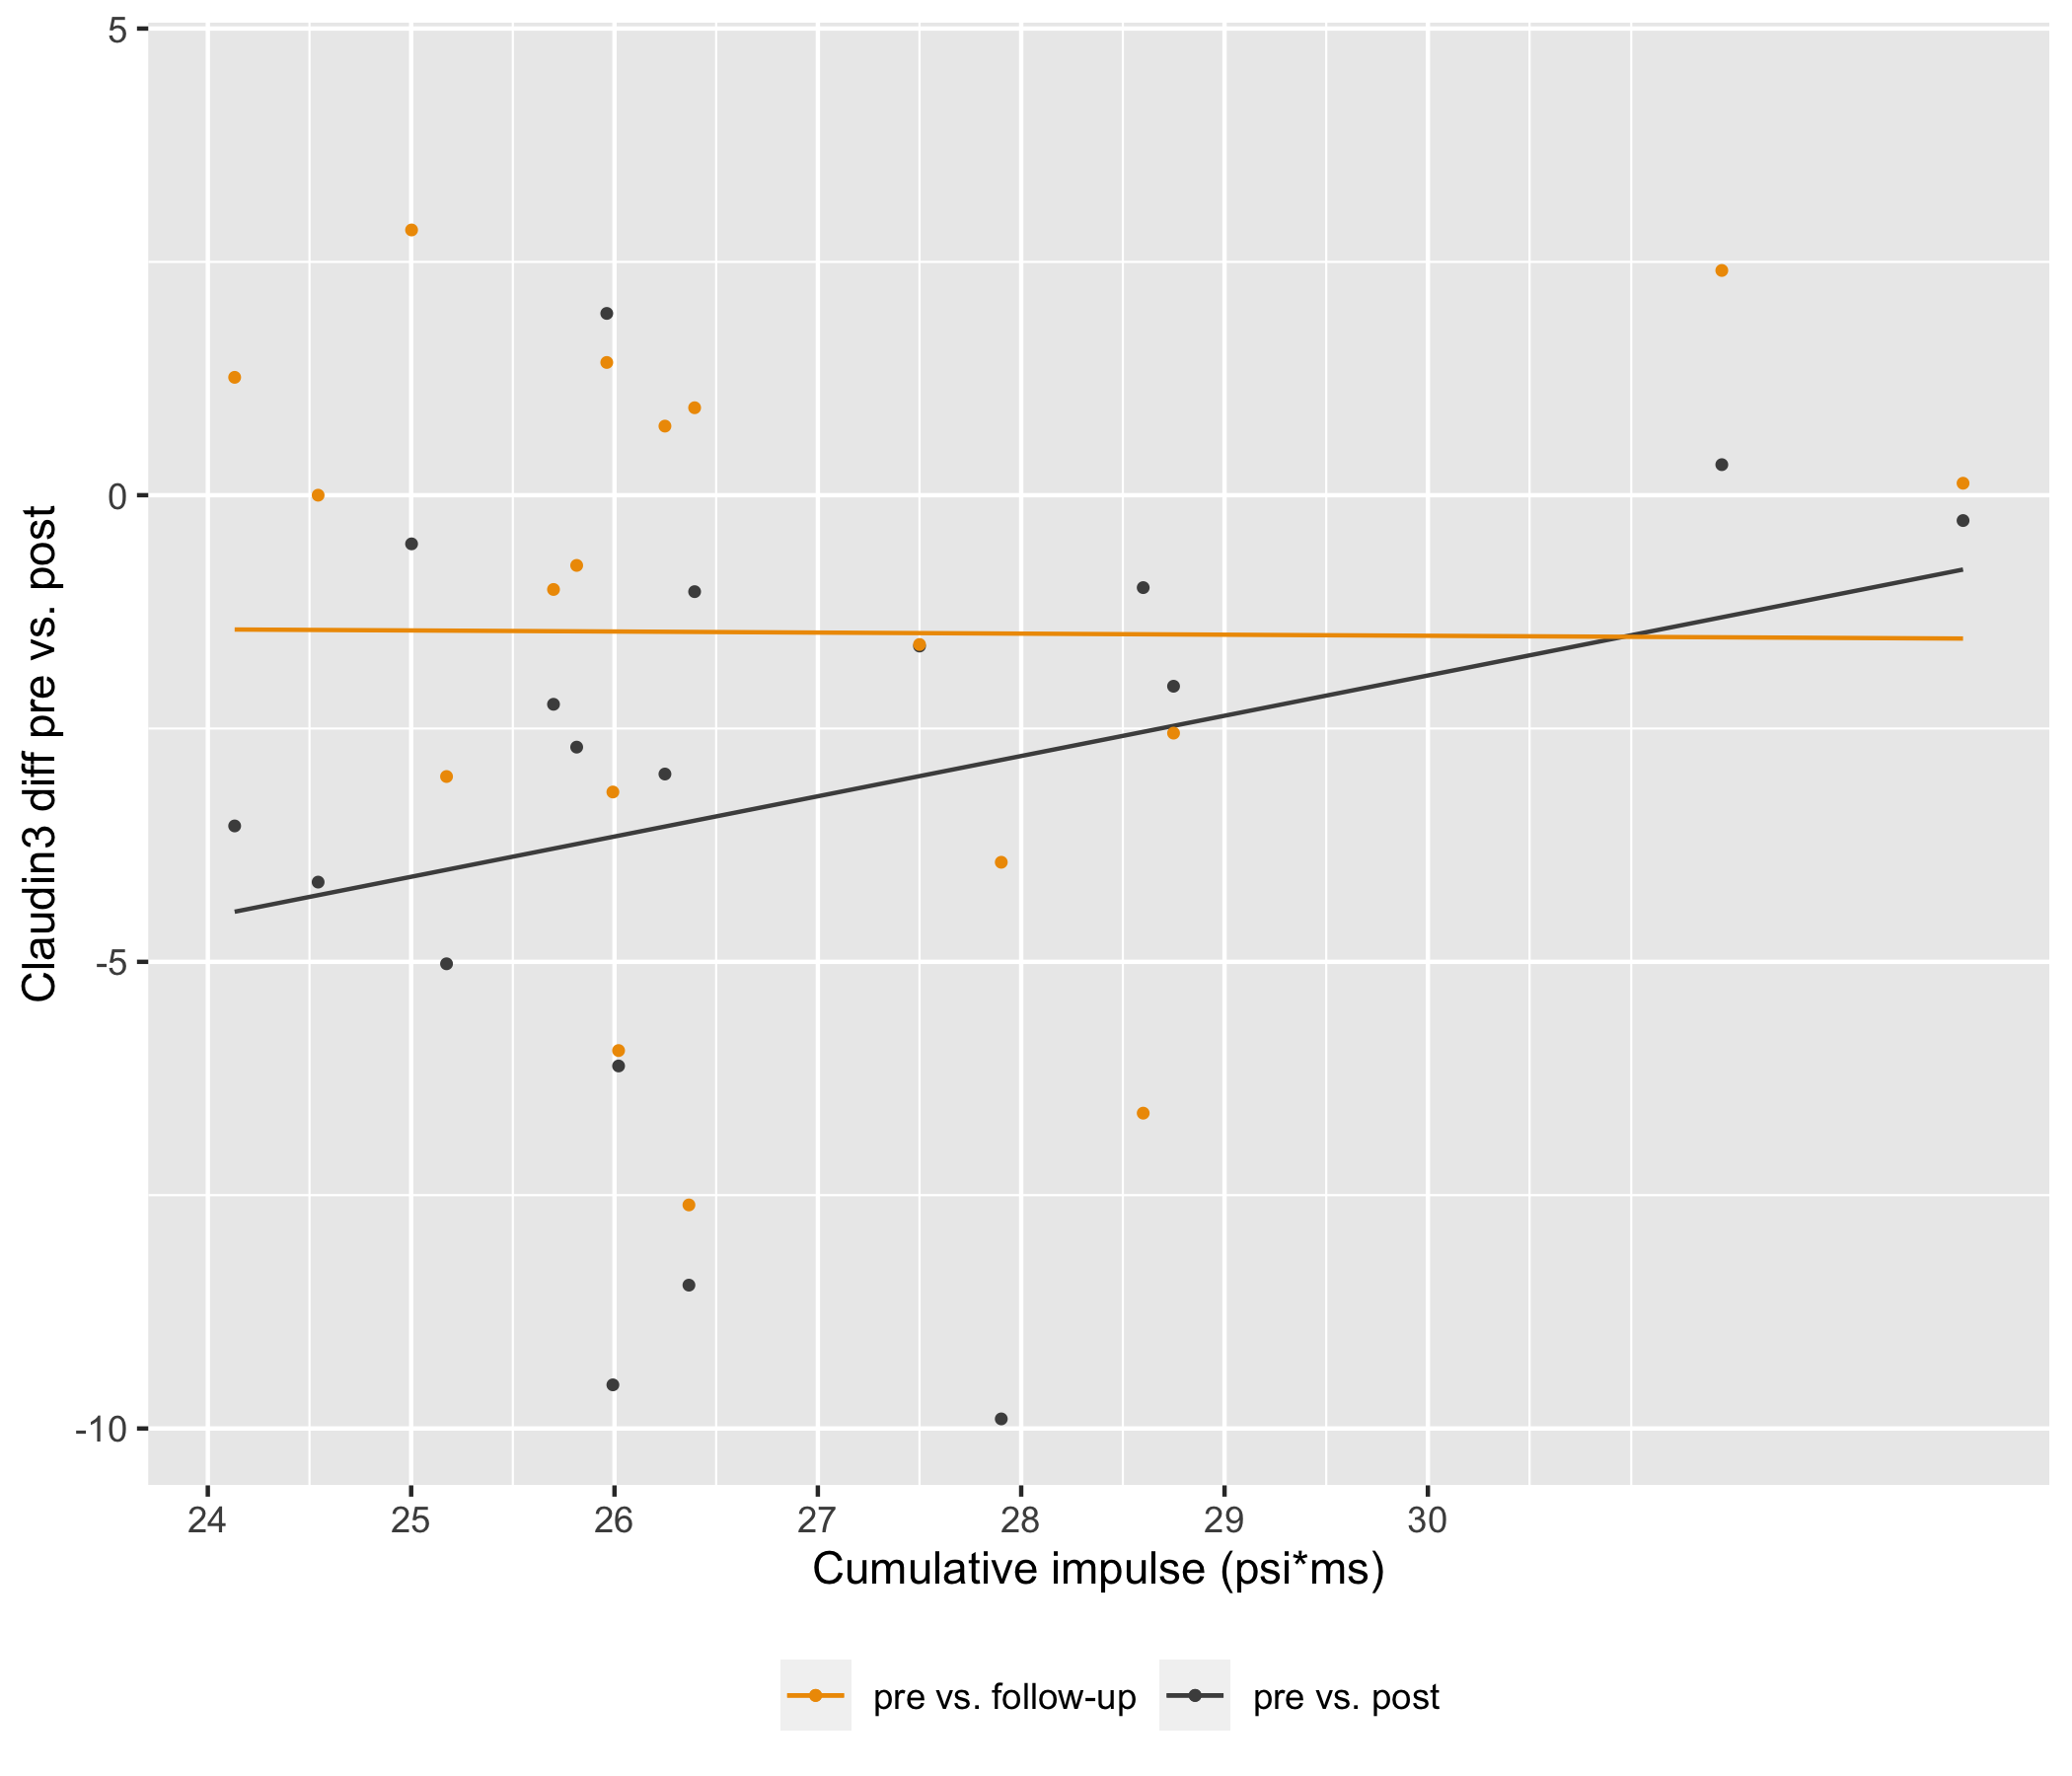

Supplement: Supplementary file 4 [file supplementary › sup/figures/magnitude vs. delta claudin3.tiff]

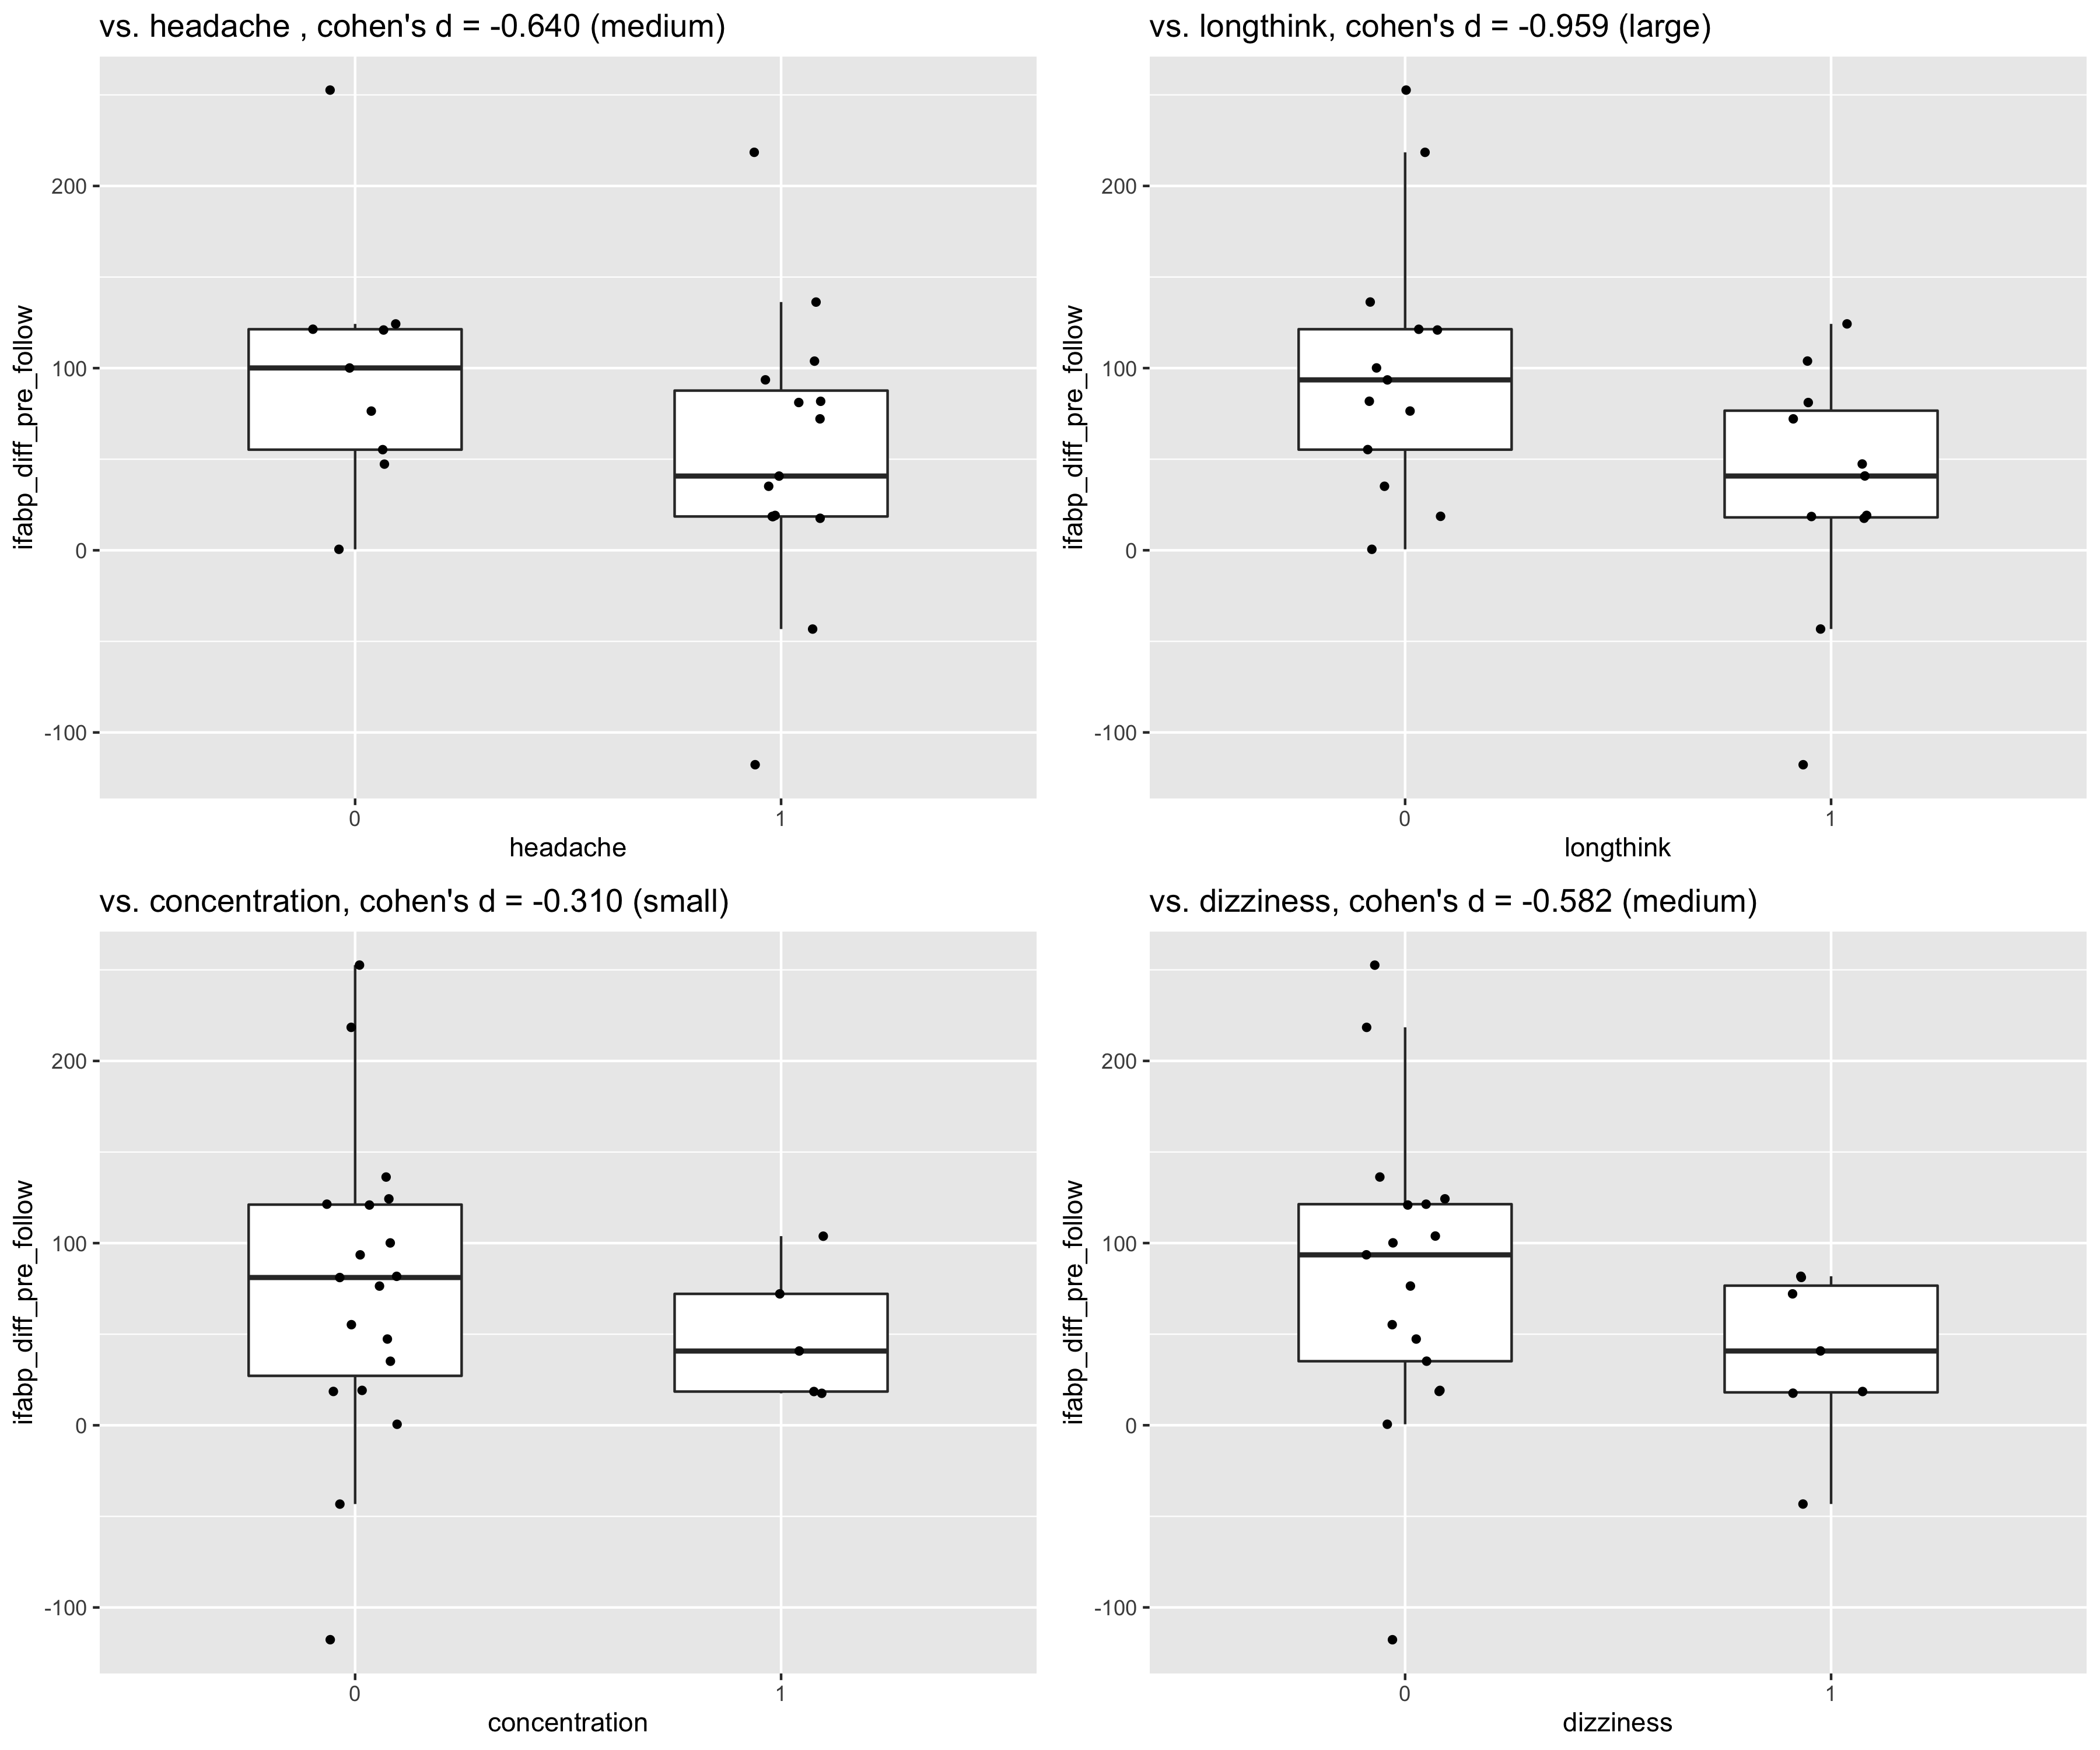

Supplement: Supplementary file 4 [file supplementary › sup/figures/symptom increase vs. ifabp diff.tiff]

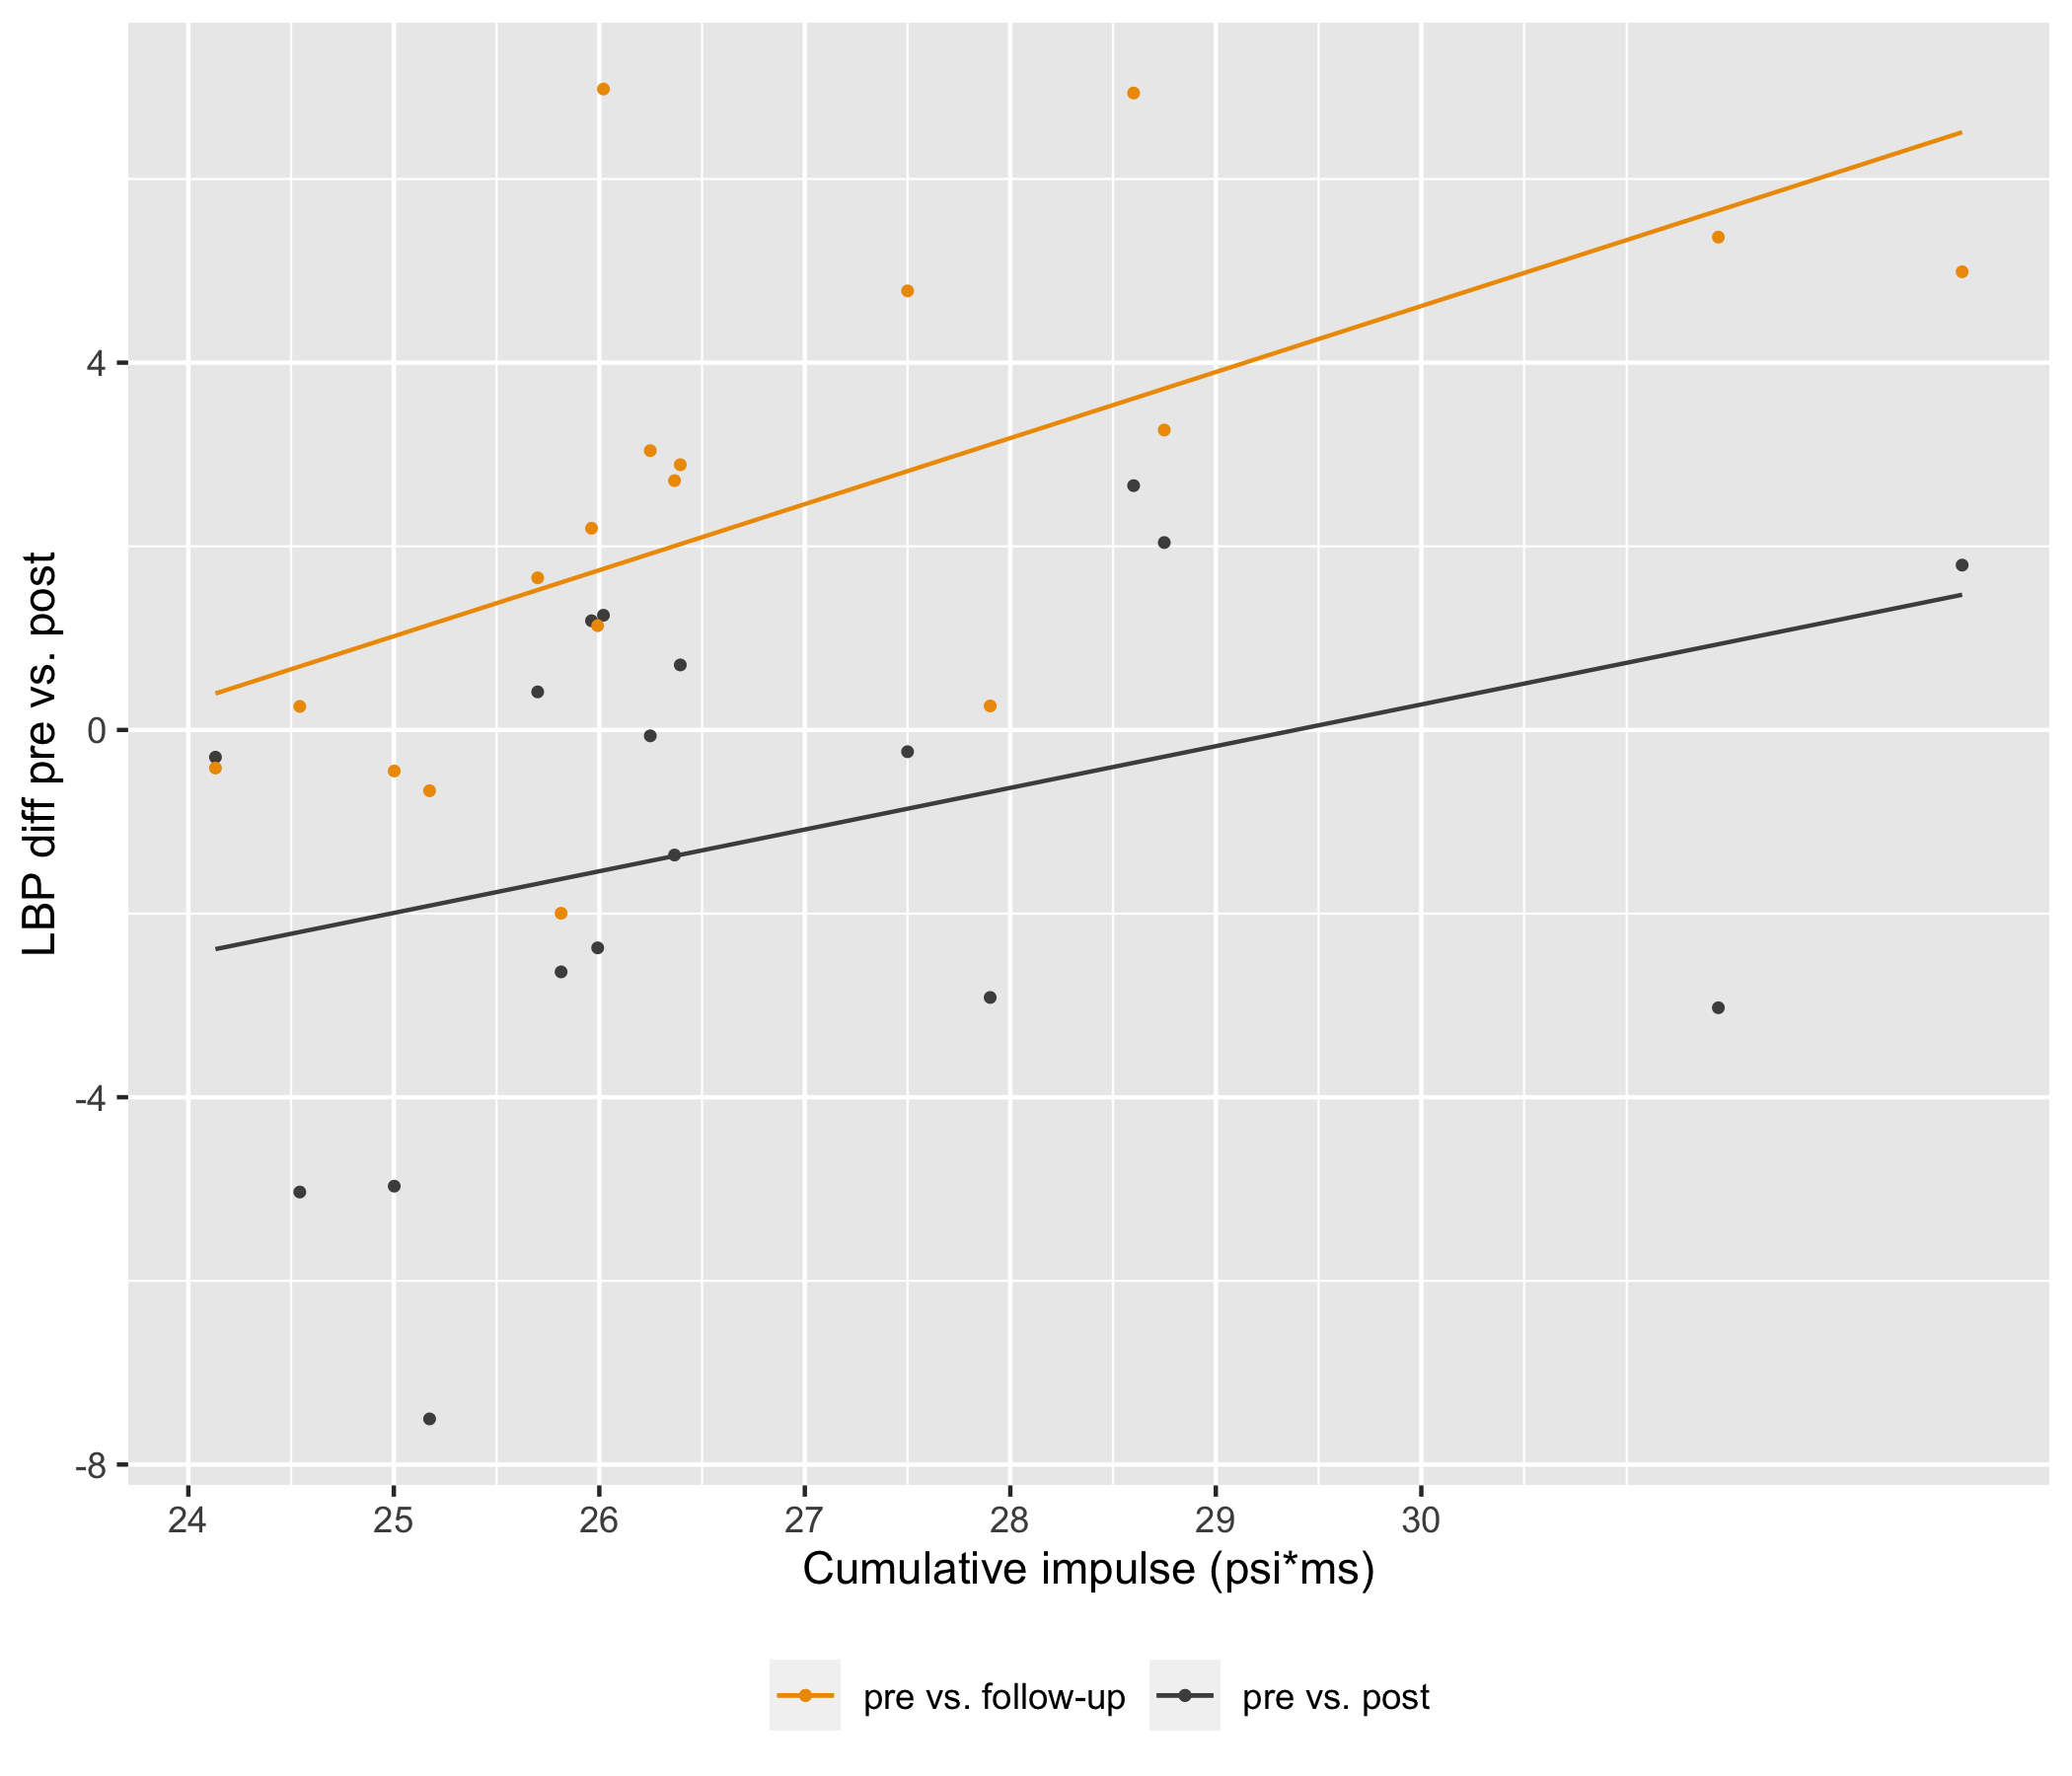

Supplement: Supplementary file 4 [file supplementary › sup/figures/magnitude vs. delta lbp.tiff]

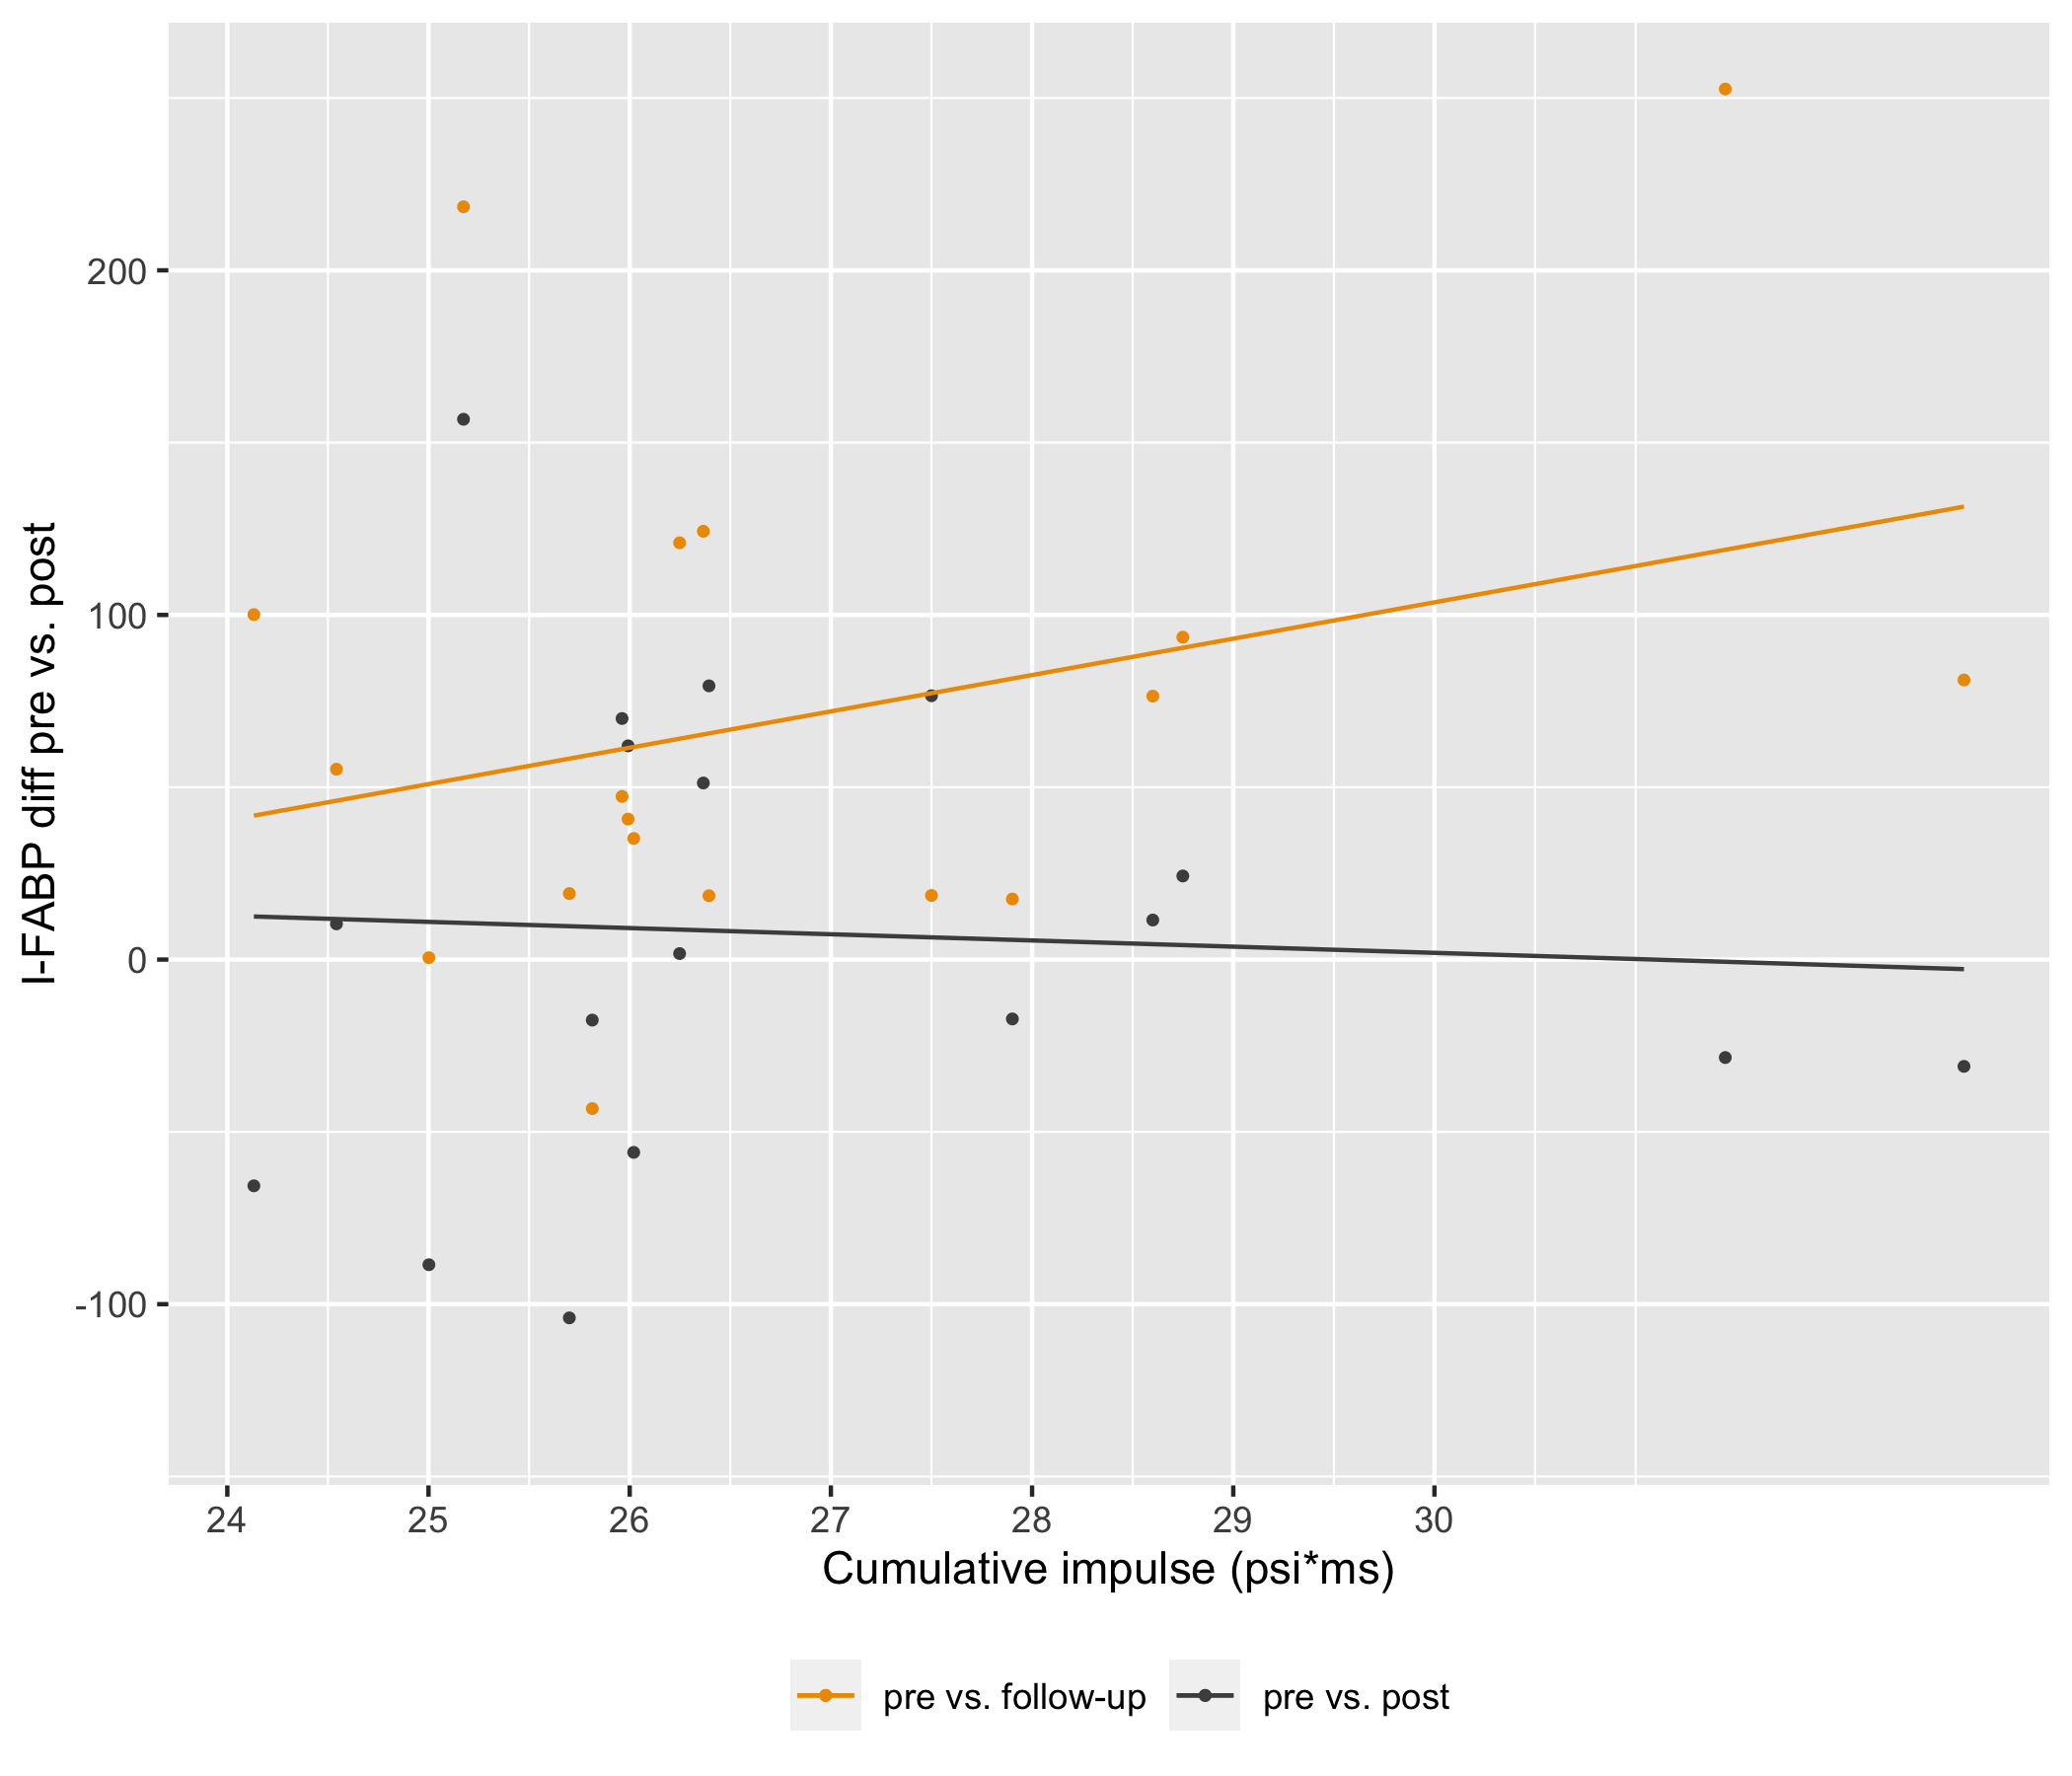

Supplement: Supplementary file 4 [file supplementary › sup/figures/magnitude vs. delta ifabp.tiff]

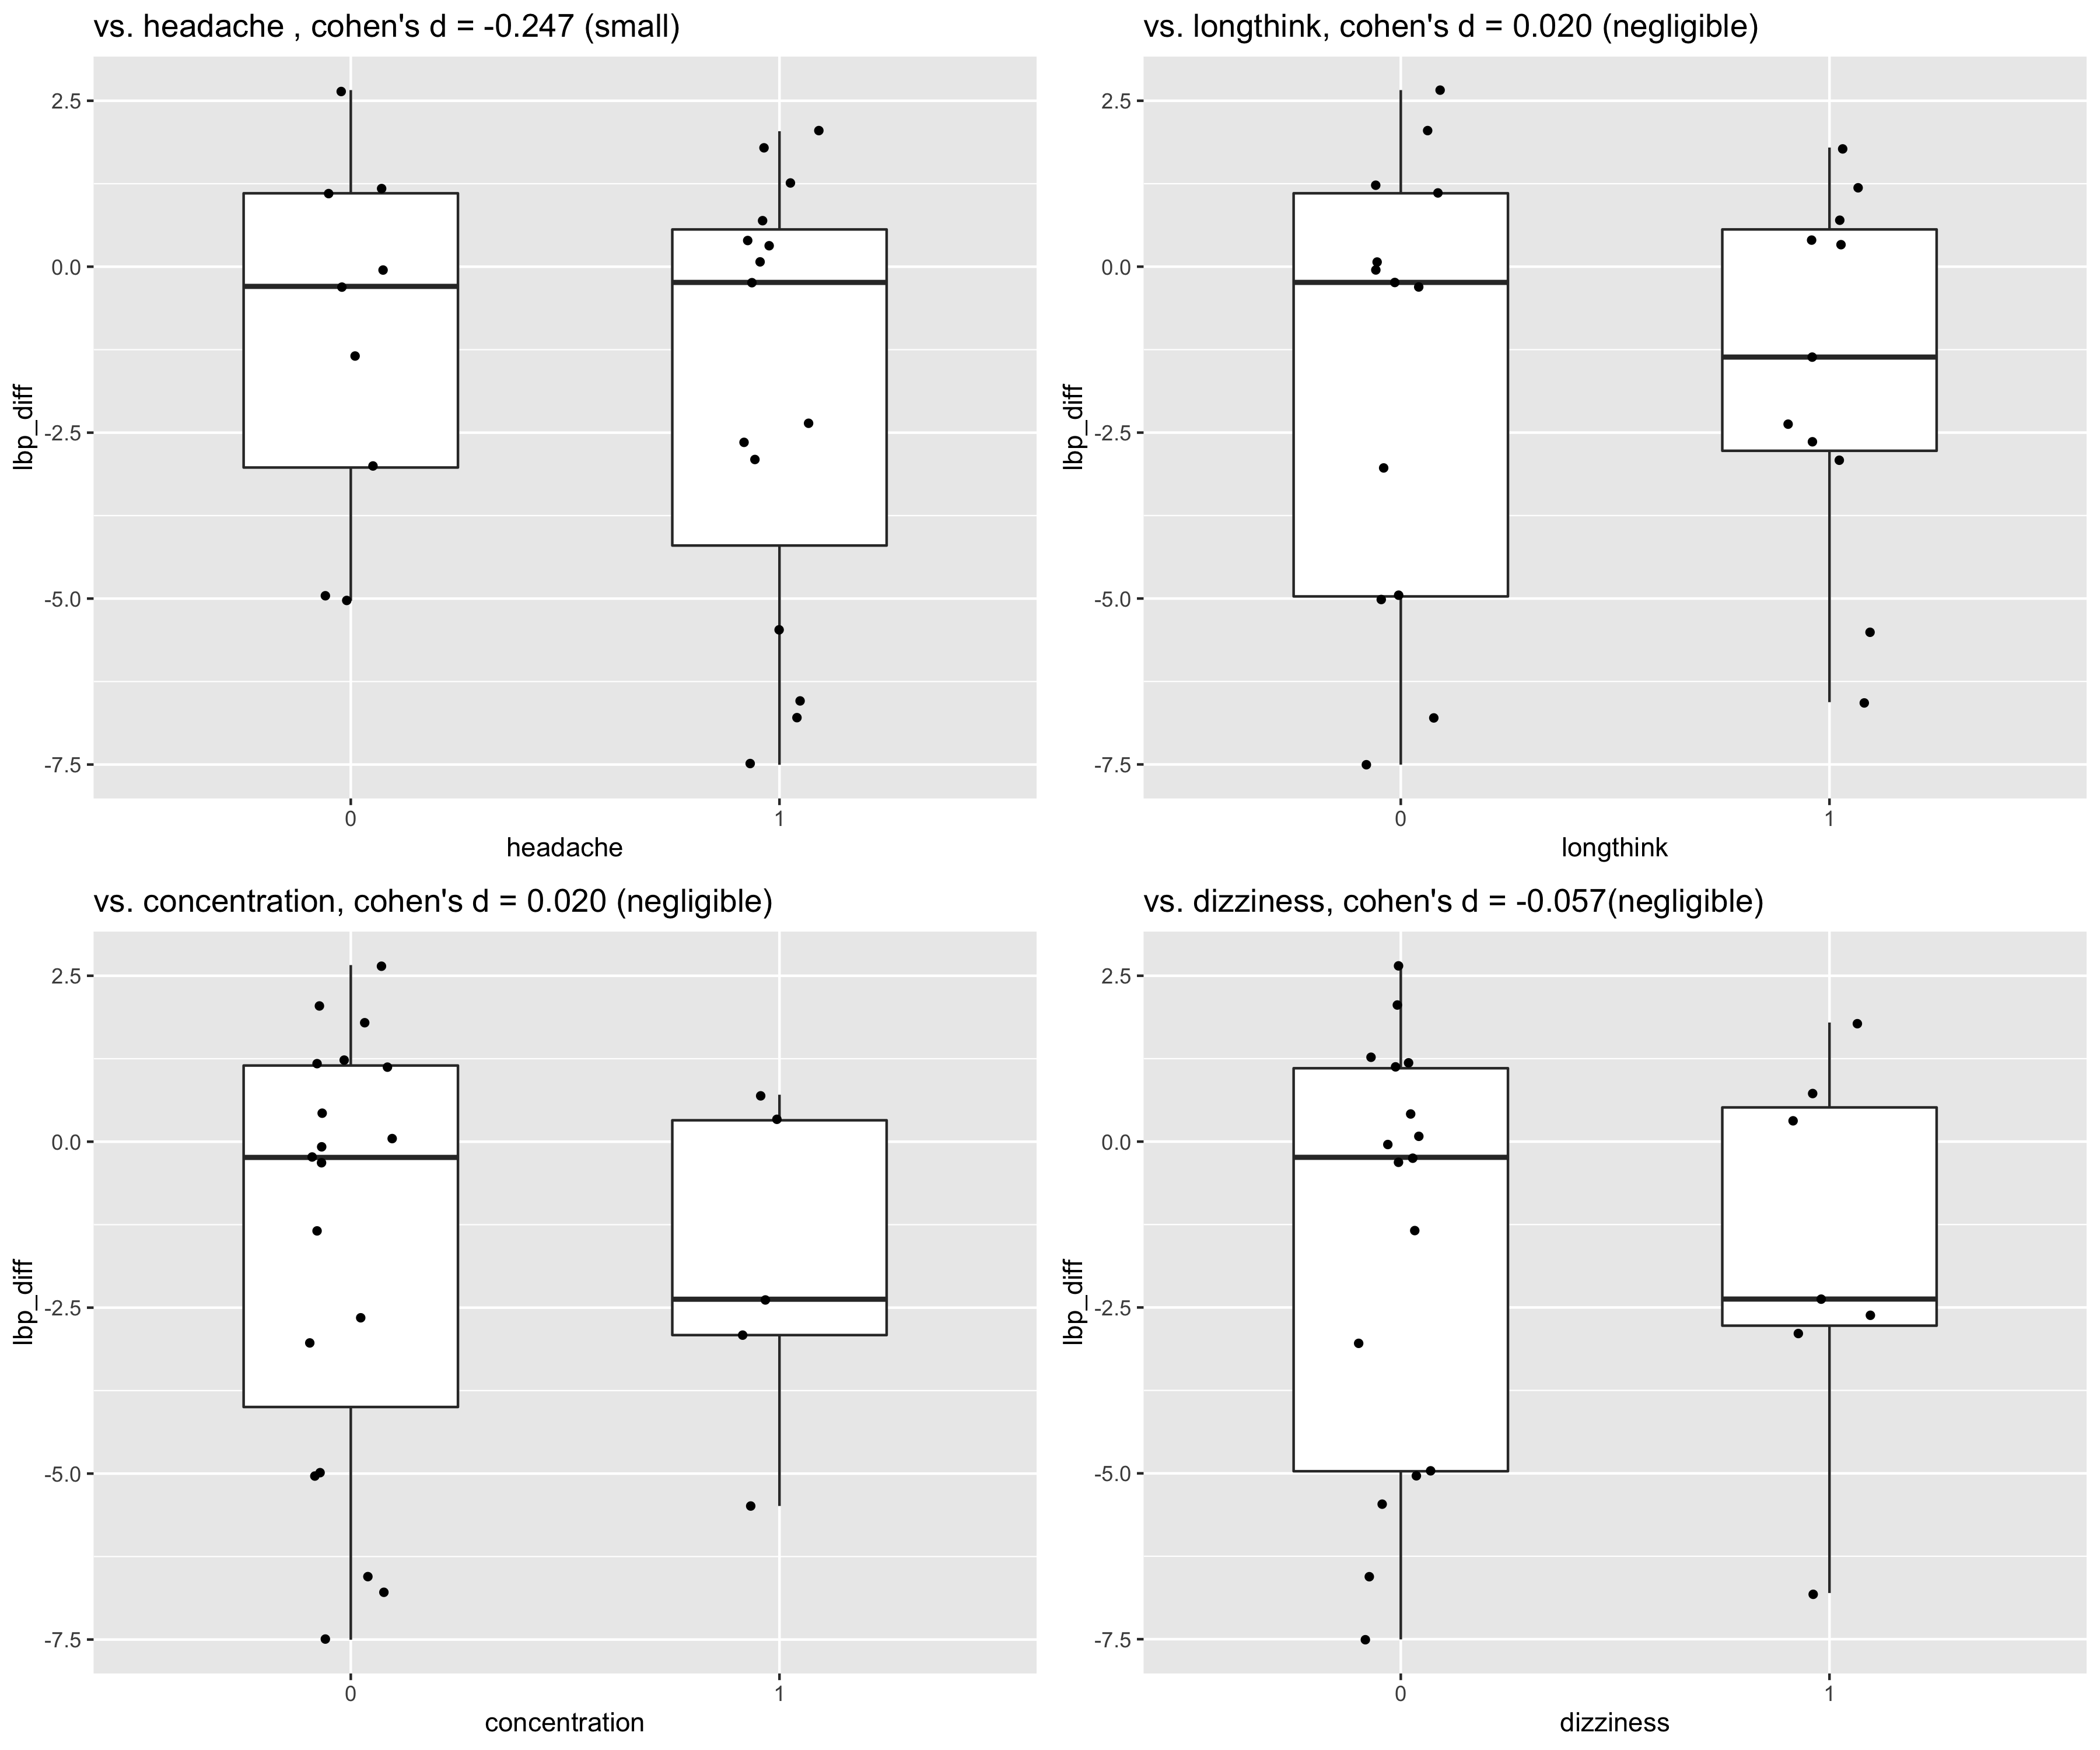

Supplement: Supplementary file 4 [file supplementary › sup/figures/symptom increase vs. lbp diff.tiff]

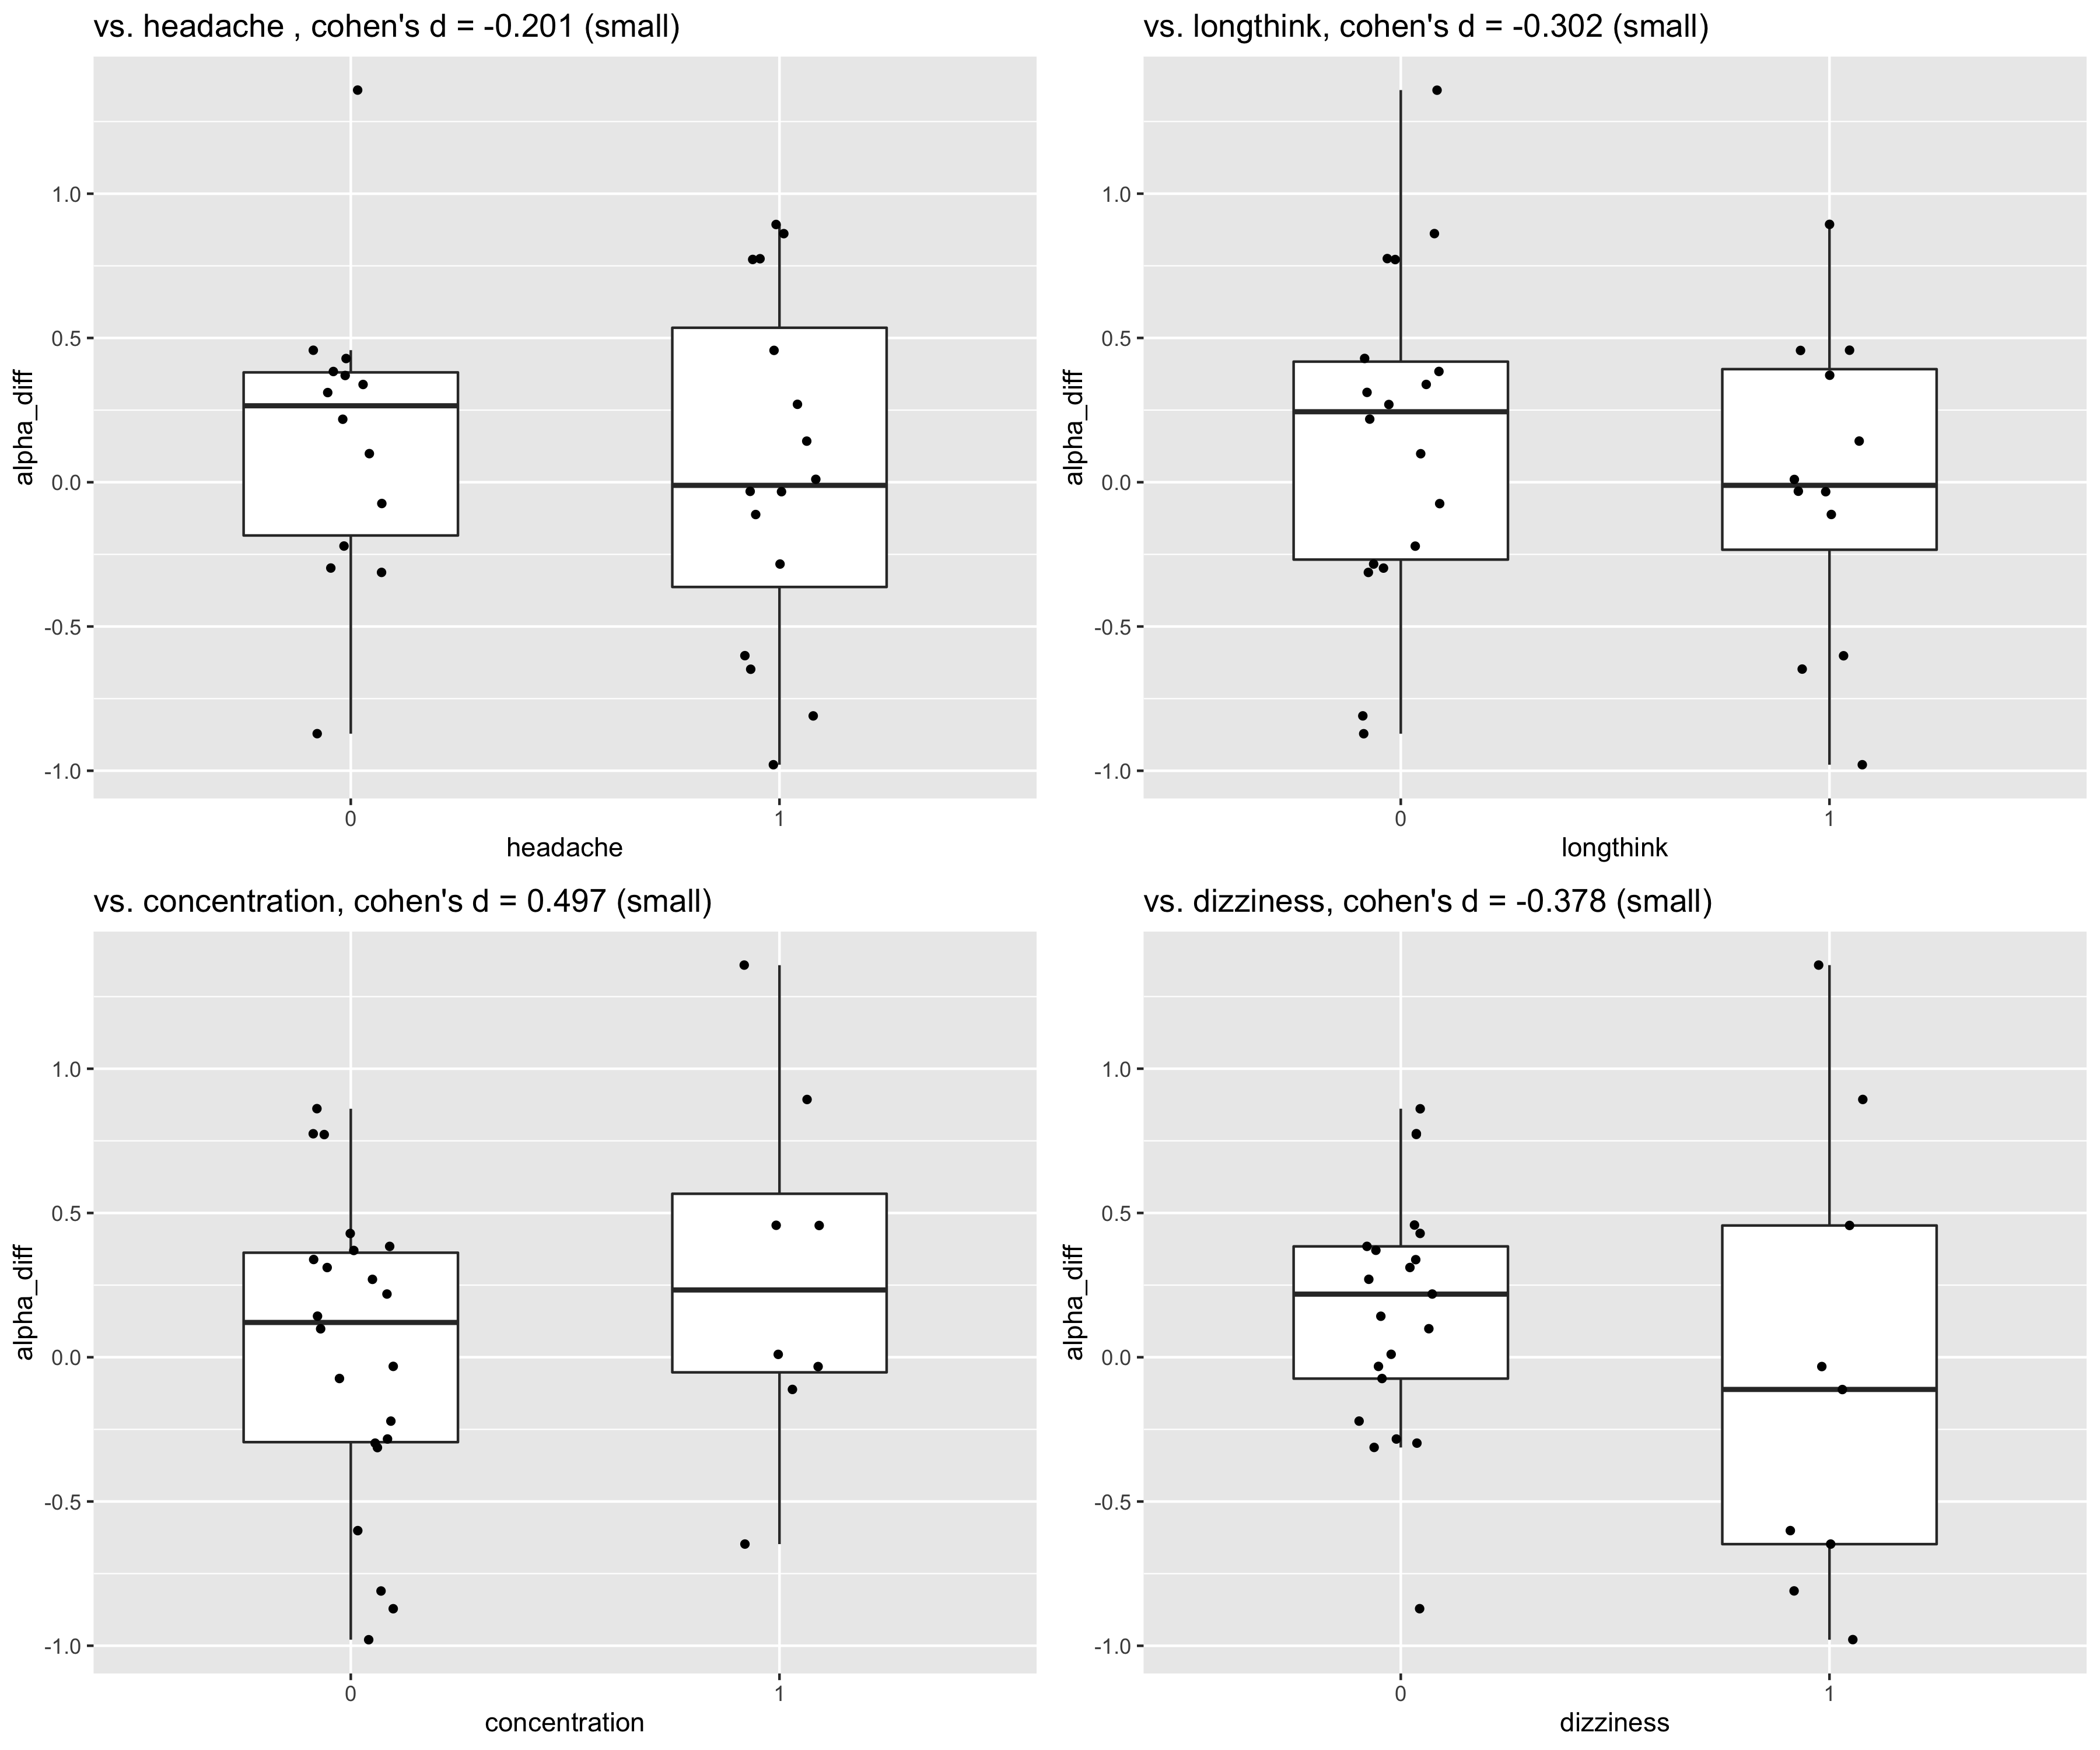

Supplement: Supplementary file 4 [file supplementary › sup/figures/symptom increase vs. alpha diff.tiff]

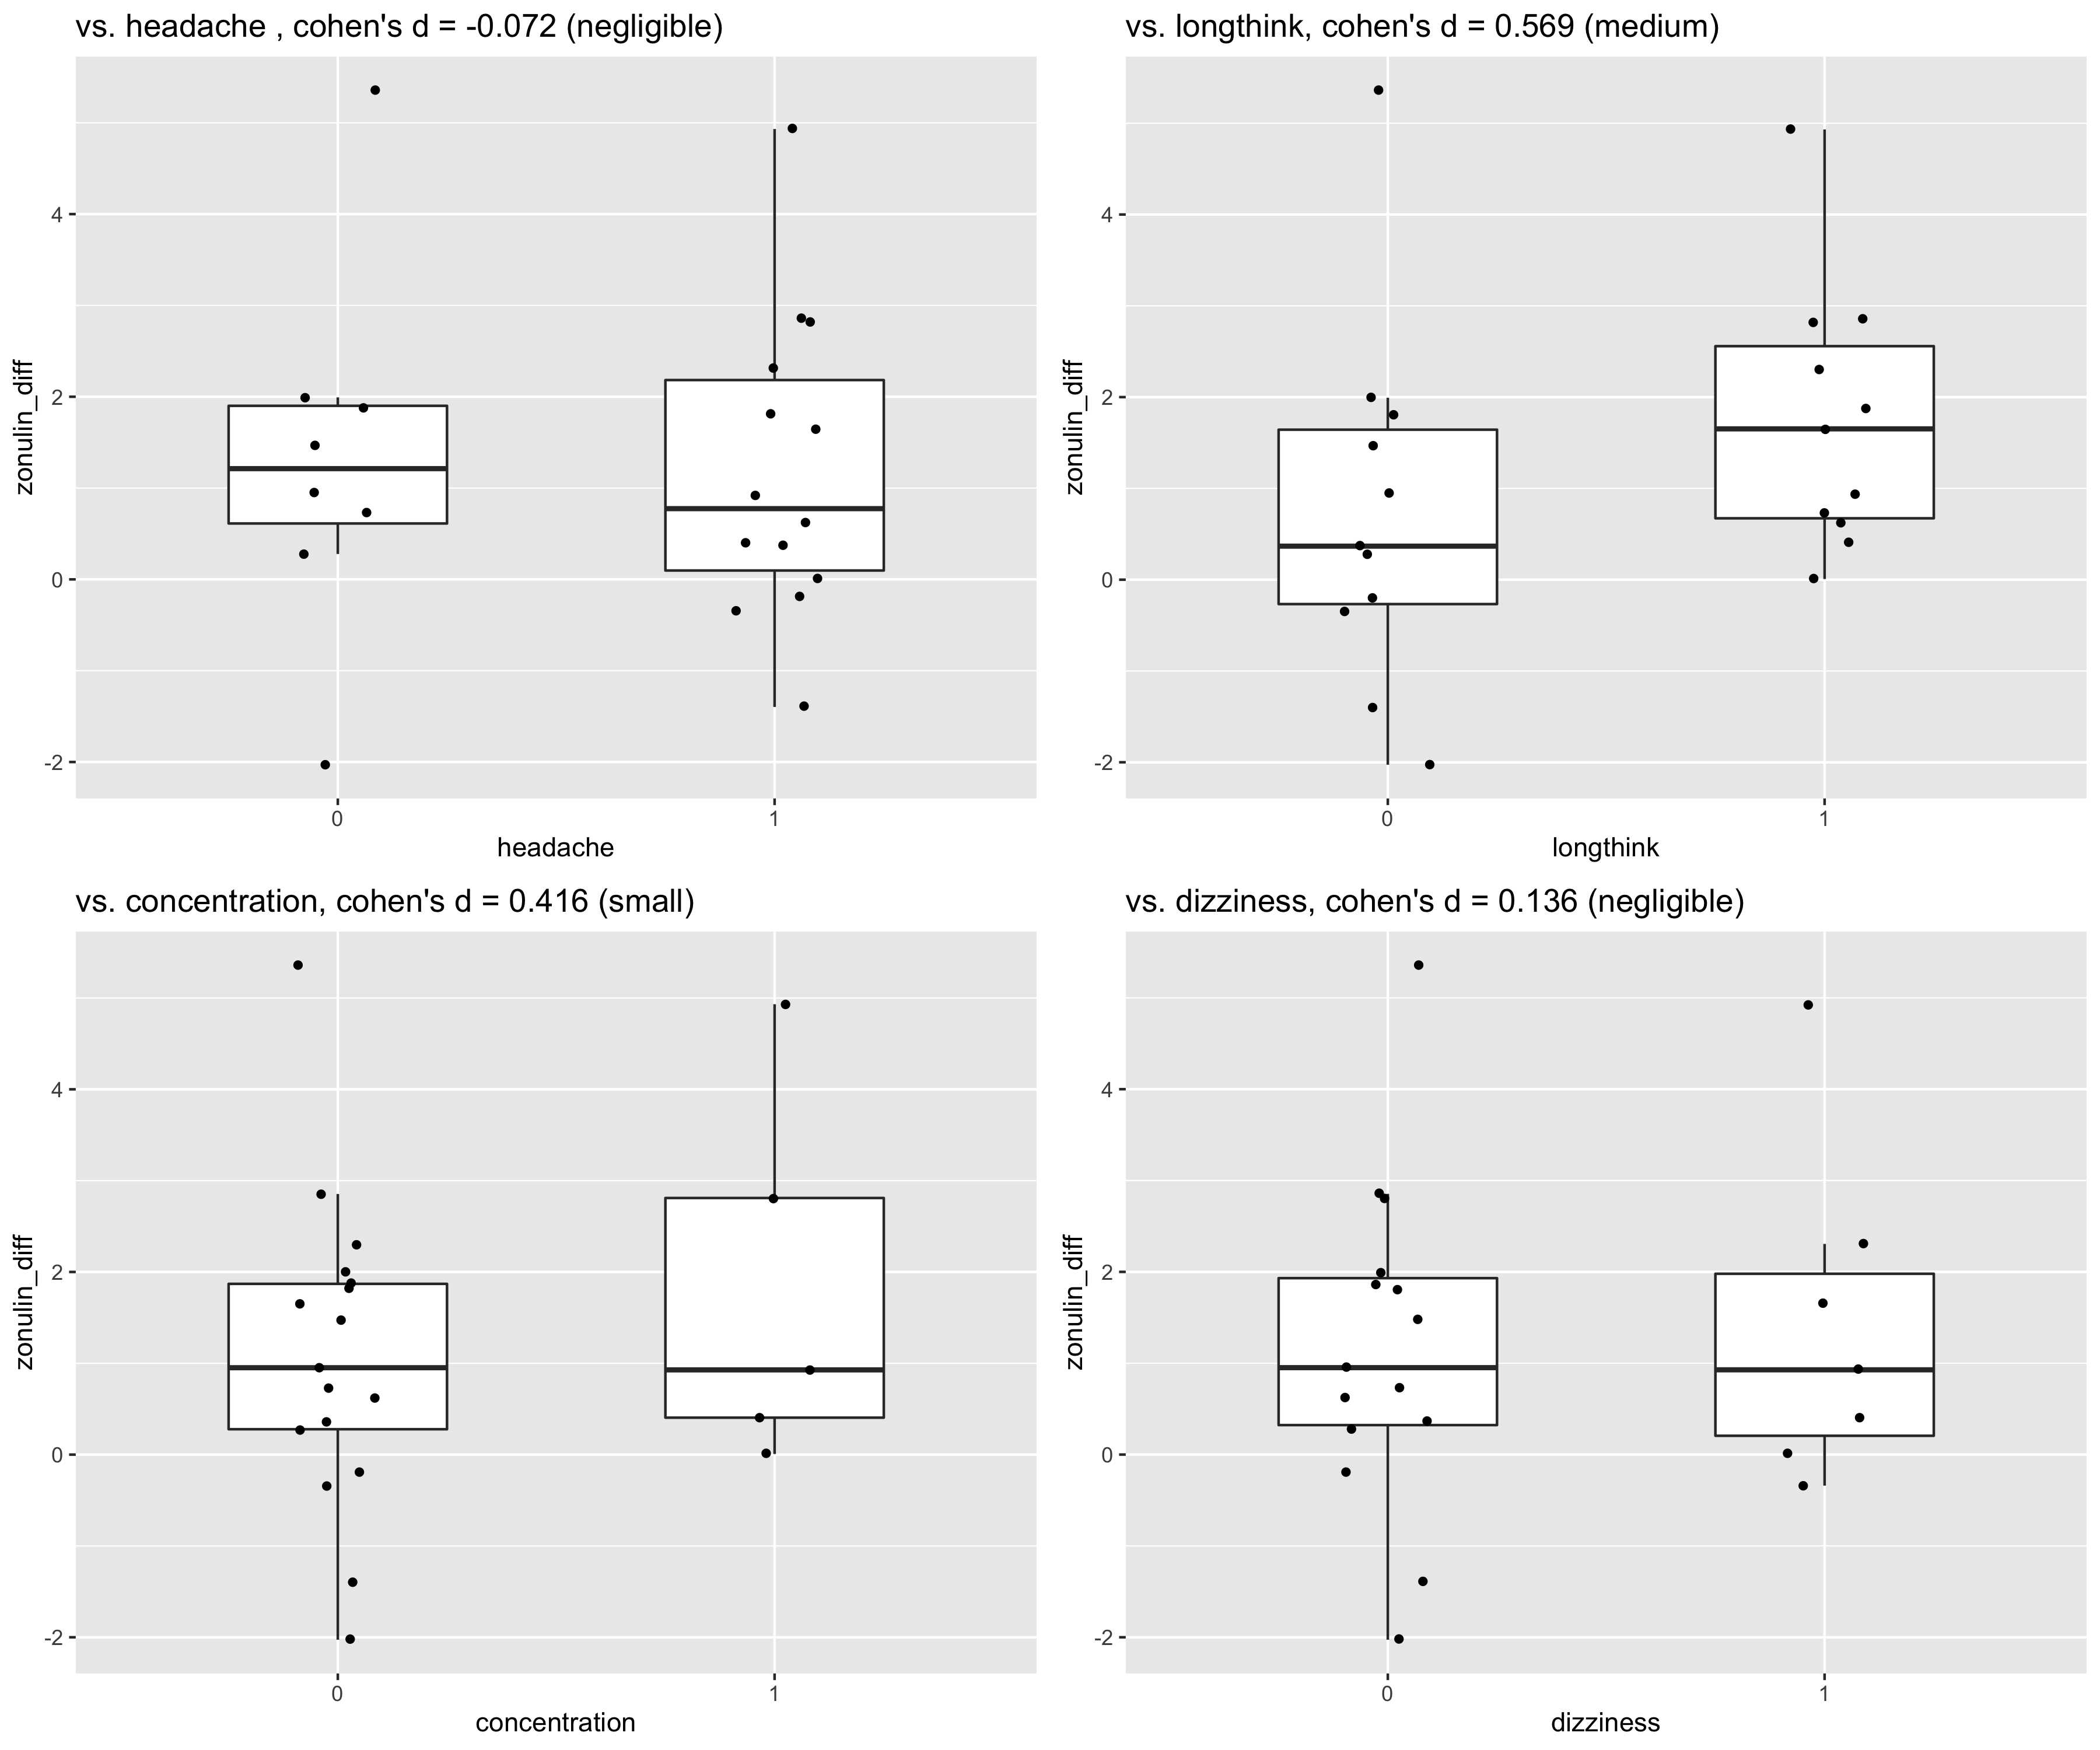

Supplement: Supplementary file 4 [file supplementary › sup/figures/symptom increase vs. zonulin diff.tiff]

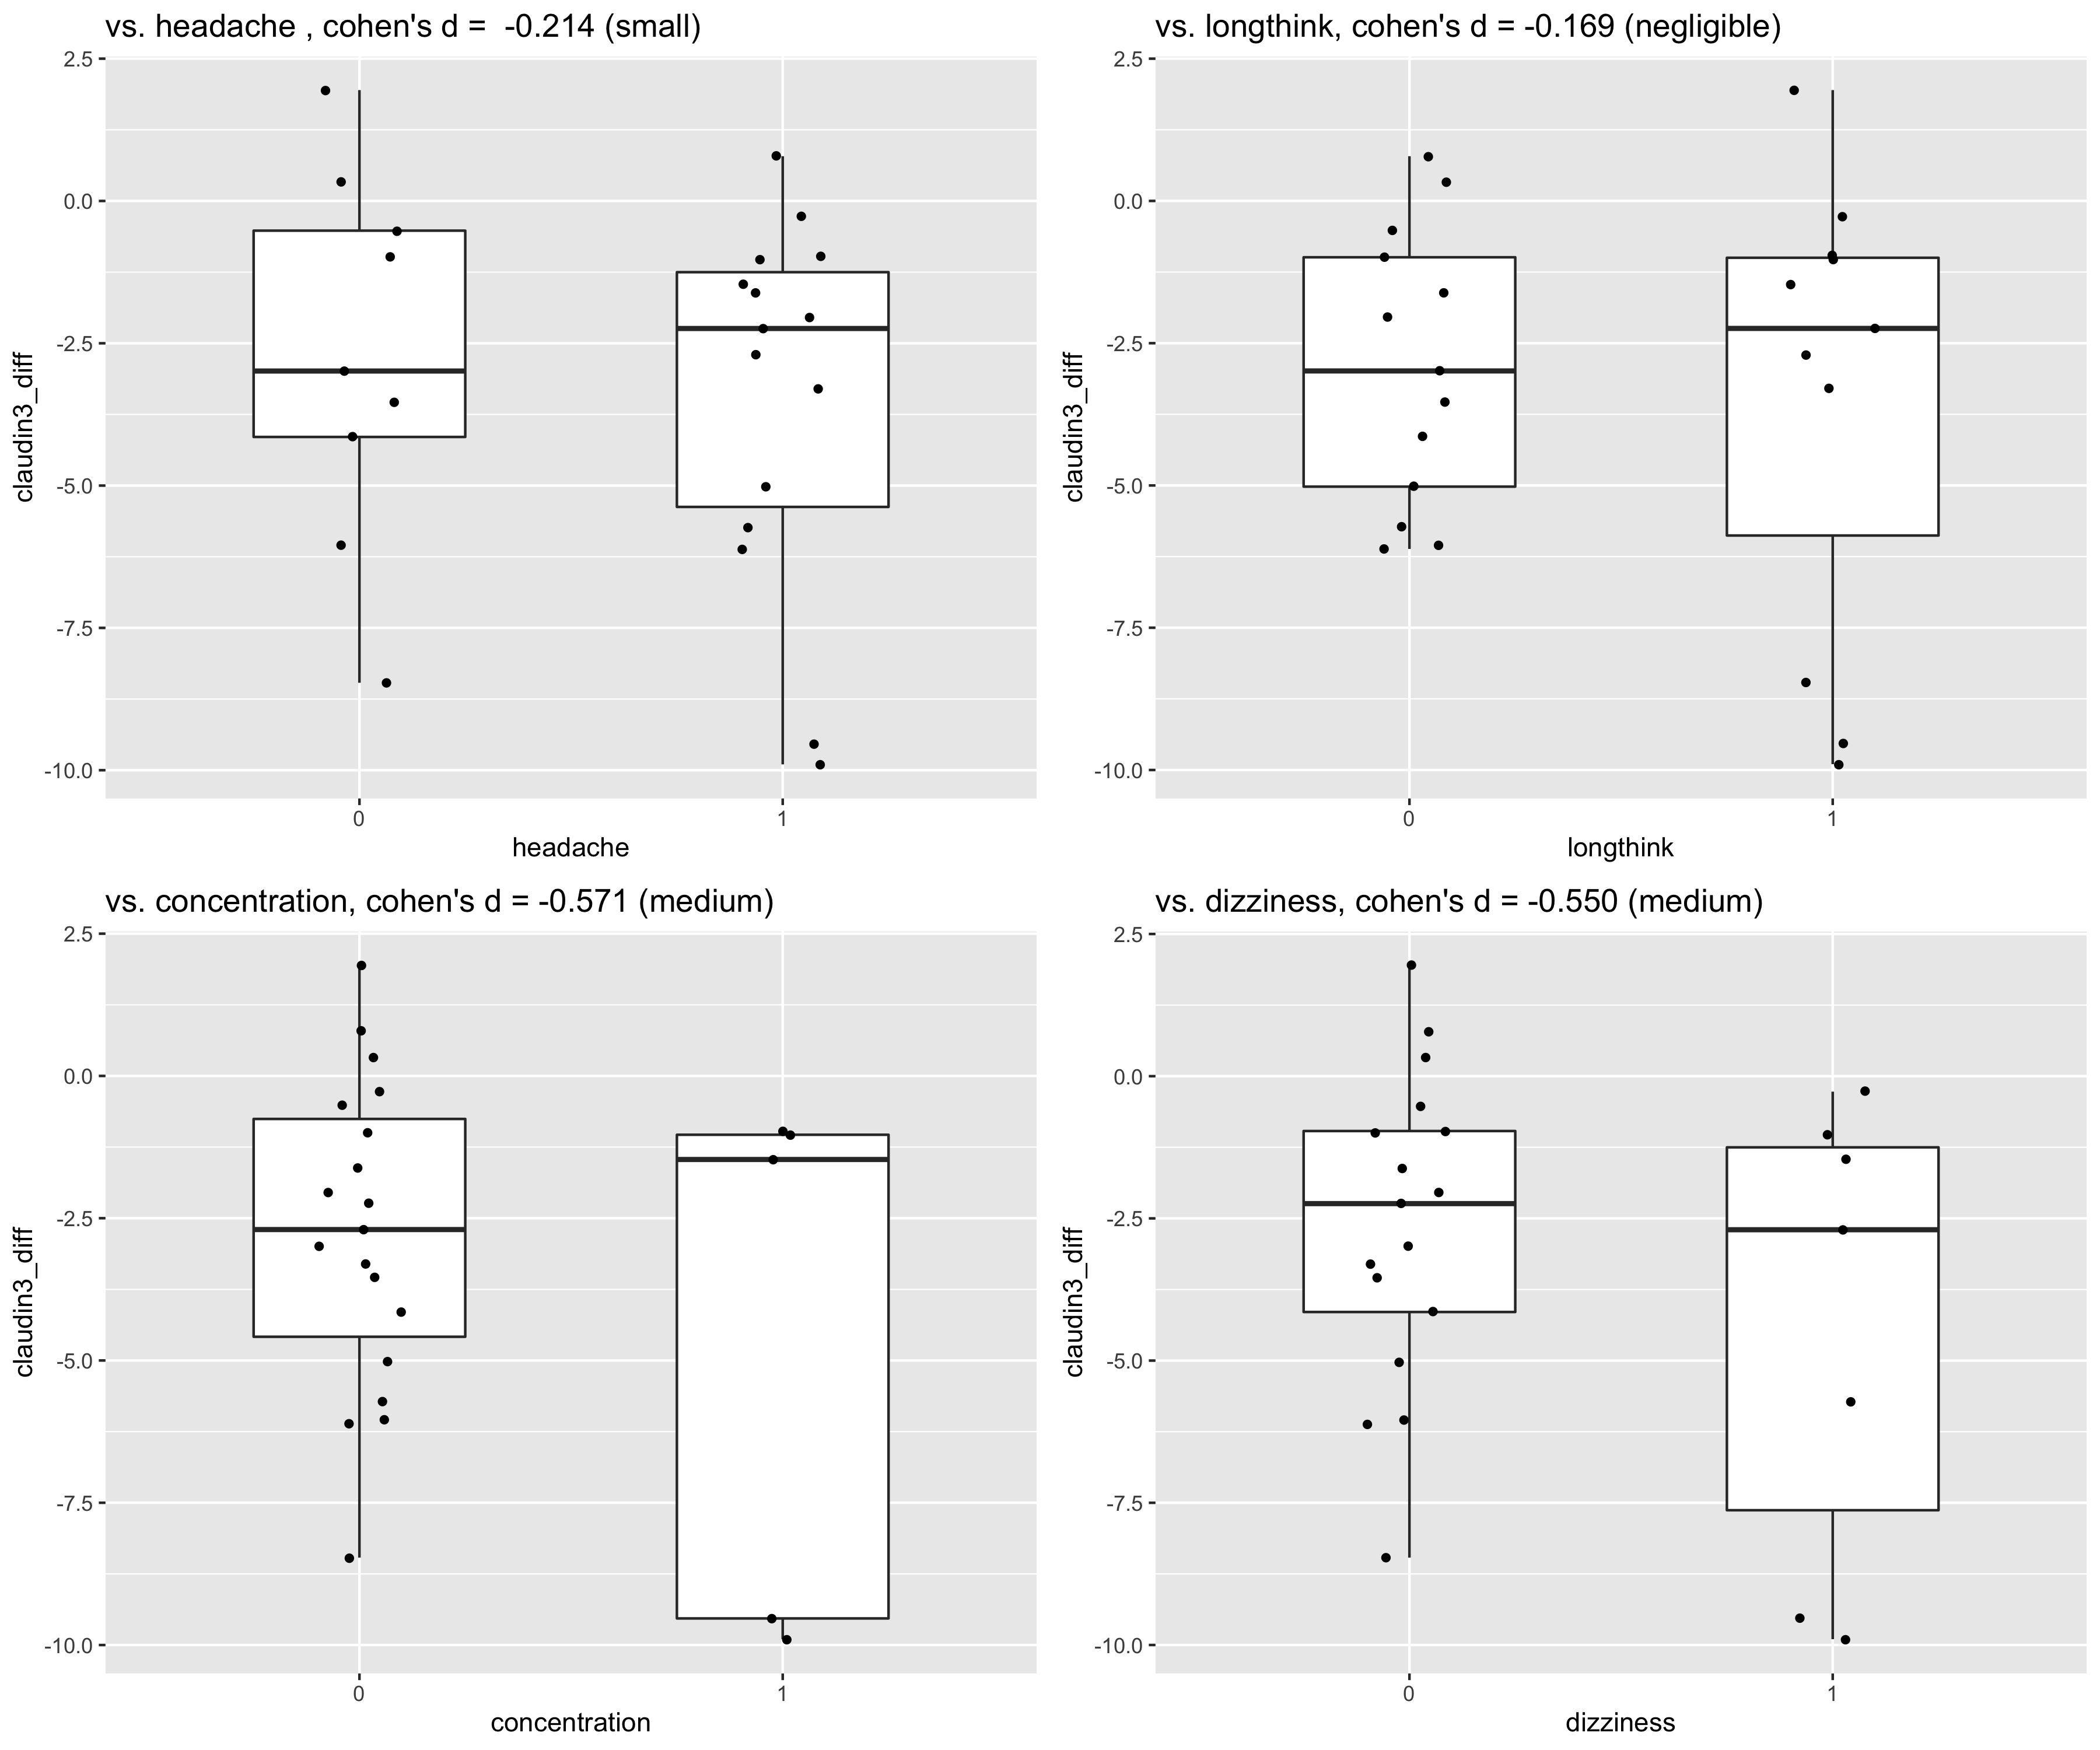

Supplement: Supplementary file 4 [file supplementary › sup/figures/symptom increase vs. claudin3 diff.tiff]
